# 1                   **Host tropism determination by convergent evolution of** 2                   **immunological evasion in the Lyme disease system**

3       Thomas M. Hart<sup>1,2</sup>, Alan P. Dupuis, II<sup>1</sup>, Danielle M. Tufts<sup>4</sup>, Anna M. Blom<sup>5</sup>, Simon Starkey<sup>1</sup>,  
4       Ryan O. M. Rego<sup>6,7</sup>, Sanjay Ram<sup>8</sup>, Peter Kraiczy<sup>9</sup>, Laura D. Kramer<sup>1,3</sup>, Maria A. Diuk-Wasser<sup>4</sup>,  
5                   Sergios-Orestis Kolokotronis<sup>10,11,12\*</sup>, and Yi-Pin Lin<sup>1,3\*</sup>

6  
7       <sup>1</sup>Division of Infectious Diseases, Wadsworth Center, New York State Department of Health,  
8       Albany, NY, USA, <sup>2</sup>Department of Biological Sciences and <sup>3</sup>Department of Biomedical  
9       Sciences, State University of New York at Albany, NY, USA, <sup>4</sup>Department of Ecology,  
10      Evolution, and Environmental Biology, Columbia University, New York, NY USA, <sup>5</sup>Division of  
11      Medical Protein Chemistry, Department of Translational Medicine, Lund University, Malmo,  
12      Sweden, <sup>6</sup> Institute of Parasitology, Czech Academy of Sciences, České Budějovice, Czech  
13      Republic, <sup>7</sup>Faculty of Science, University of South Bohemia, České Budějovice, Czech Republic,  
14      <sup>8</sup>Division of Infectious Diseases and Immunology, University of Massachusetts Medical School,  
15      Worcester, MA, USA, <sup>9</sup>Institute of Medical Microbiology and Infection Control, University  
16      Hospital of Frankfurt, Frankfurt, Germany, <sup>10</sup>Department of Epidemiology and Biostatistics,  
17      School of Public Health, SUNY Downstate Health Sciences University, Brooklyn, NY, USA,  
18      <sup>11</sup>Institute for Genomic Health, SUNY Downstate Health Sciences University, Brooklyn, NY,  
19      USA, <sup>12</sup>Division of Infectious Diseases, Department of Medicine, College of Medicine, SUNY  
20                   Downstate Health Sciences University, Brooklyn, NY, USA..

21      Short title: Convergent evolution of a microparasite protein and host tropism

22      Key words: Lyme disease, CspA, Host tropism, *Borrelia*, Complement, Convergent evolution

23 \*correspondence: Sergios-Orestis Kolokotronis, Ph.D.  
24 Department of Epidemiology and Biostatistics. School of Public Health  
25 SUNY Downstate Health Sciences University  
26 450 Clarkson Ave, MSC43A, Brooklyn, NY 11203, USA  
27 Telephone: +1 718-270-6741; Fax: +1 718-270-2533  
28 Email: [SOK@downstate.edu](mailto:SOK@downstate.edu)

29  
30 \*correspondence: Yi-Pin Lin, Ph.D.  
31 Division of Infectious Disease, Wadsworth Center, New York State  
32 Department of Health  
33 120 New Scotland Ave, Albany, NY 12047, USA  
34 Telephone: +1 518-402-2233; Fax: +1 518-473-1326  
35 Email: [Yi-Pin.Lin@health.ny.gov](mailto:Yi-Pin.Lin@health.ny.gov)

36 **ABSTRACT (150 words)**

37 Microparasites selectively adapt in some hosts, known as host tropism. Transmitted through  
38 ticks and carried mainly by mammals and birds, the Lyme disease (LD) bacterium is a well-  
39 suited model to study such tropism. LD bacteria species vary in host ranges through  
40 mechanisms eluding characterization. By feeding ticks infected with different LD bacteria  
41 species, utilizing feeding chambers and live mice and quail, we found species-level differences  
42 of bacterial transmission. These differences localize on the tick blood meal, and complement, a  
43 defense in vertebrate blood, and a bacterial polymorphic protein, CspA, which inactivates  
44 complement by binding to a host complement inhibitor, FH. CspA selectively confers bacterial  
45 transmission to vertebrates that produce FH capable of allele-specific recognition. Phylogenetic  
46 analyses revealed convergent evolution as the driver of such findings, which likely emerged  
47 during the last glacial maximum. Our results identify LD bacterial determinants of host  
48 tropism, defining an evolutionary mechanism that shapes host-microparasite associations.

49

50 **INTRODUCTION**

51 The interactions between hosts and microparasites (e.g. bacteria, viruses, and protozoa) have  
52 arisen through numerous evolutionary events (1, 2), often resulting in generalist microparasites,  
53 which adapt to most host environments, or specialists, which selectively survive in particular  
54 host species. The association between microparasites and their respective hosts is defined as  
55 “host tropism (or host specialization)” (3). For vector-borne microparasites, such a host tropism  
56 can be dictated by not only host factors but also host constituents in the vectors (e.g. blood  
57 meals) (4). Because many bacteria varying in host specificity are involved in the infection cycle,  
58 the Lyme disease bacterium is one of the models regularly applied to investigate the host-

59 microparasite interactions (4). Carried by *Ixodes* ticks, this disease is the most common vector-  
60 borne disease in the northern hemisphere (5). The causative agent of Lyme disease is a  
61 genospecies complex of the spirochete *Borrelia burgdorferi* sensu lato (also known as  
62 *Borrelia burgdorferi* sensu lato (NCBI taxid: 139), Lyme borreliae) (6). Among these  
63 genospecies, the most frequently isolated spirochetes from both ticks and vertebrate hosts are *B.*  
64 *afzelii*, *B. garinii*, and *B. burgdorferi* sensu stricto (hereafter referred to as *B. burgdorferi*) (7).  
65 Following the tick bite, spirochetes need to survive in tick blood meals, which permit  
66 transmission to the bite site of the host skin. Survival in host bloodstream then is a prerequisite  
67 for hematogenous dissemination and colonization of distant tissues, resulting in varied disease  
68 manifestations involving different organs in incidental hosts such as humans (8). In nature, Lyme  
69 borreliae can invade vertebrate reservoirs (mainly birds and rodents) but varying in their ability  
70 to infect these animals in a host-specific manner (9, 10). For example, some Lyme borreliae  
71 species, such as *B. burgdorferi*, can invade a wide range of hosts whereas others are selectively  
72 infectious in few host taxa (e.g. *B. afzelii* for rodents and *B. garinii* for birds). However, the  
73 molecular basis for such host tropism is largely unclear (9, 10).

74 The elimination of microparasites by host immune responses is a major bottleneck of  
75 infectivity, limiting the breadth of host competence (9, 11, 12). Complement is one of the first  
76 lines of host defenses in vertebrate animals and can be activated through three canonical routes:  
77 the classical, lectin, and alternative pathways (13). The activation of complement on the  
78 microparasite surface results in the formation of a protein complex called C3 convertase. C3  
79 convertase is essential for complement function because it serves as a protease to cleave C3  
80 protein to its active fragments. Further complement activation leads to the lysis of microparasites  
81 due to the formation of membrane attack complex pores (C5b-9) on microparasite surface. C3

82 convertase formed by alternative pathway activation, called C3bBb (composed of C3b and Bb  
83 proteins), activates more C3 molecules and results in a positive feedback of the C3 amplification  
84 loop, a unique characteristic of the alternative pathway. To avoid tissue damage from unwanted  
85 complement activation in the absence of microparasites, hosts possess complement inhibitors  
86 (13, 14). One of these inhibitors is factor H (FH), which binds to C3b and blocks further  
87 activation of complement (13, 15). Like other microparasites, Lyme borreliae exploit such host  
88 self-regulatory mechanisms by recruiting complement inhibitors on their surface (10, 16-18),  
89 which allows spirochetes to evade complement-mediated killing in the host bloodstream or tick  
90 blood meals (10, 16-18). In fact, spirochetes bind to FH through the production of several  
91 bacterial FH-binding proteins, called Complement Regulators Acquiring Surface Proteins  
92 (CRASPs): CspA, CspZ, and OspE-related proteins (19, 20). Among these CRASPs, CspA is  
93 uniquely required for bacterial transmission from nymphal ticks to vertebrate animals by binding  
94 to FH, resulting in complement evasion in those feeding ticks (21-23).

95 Interestingly, the ability of CspA to bind to FH from different vertebrate hosts varies by alleles  
96 and dictates the specificity of a Lyme borreliae species to survive in the sera of various animals  
97 (21, 24, 25). Specifically, the ability of CspA variants to bind to mammalian FH and survive in  
98 homologous sera correlates with the ability of these variants to promote tick-to-mouse  
99 transmission (21). These findings raise a possibility that CspA-mediated, FH binding-dependent  
100 complement evasion drives Lyme borreliae host tropism (9, 10). However, that possibility could  
101 not be fully demonstrated until we could elucidate the roles of CspA variants that do not promote  
102 tick-to-mouse transmission to confer tickborne transmission to other hosts. Additionally, if CspA  
103 is one of the spirochete determinants of host tropism, what evolutionary mechanisms give rise to  
104 the host-spirochete associations mediated by this protein?

105 In this study, we used Lyme disease spirochetes, avian and mammalian hosts, and the blood of  
106 mammals and birds as models to examine the role of complement in driving host tropism of  
107 microparasites. We further identified CspA as a molecular determinant for such tropism and  
108 elucidated the evolutionary mechanisms resulting in the allelically specific roles of this protein in  
109 conferring maintenance of microparasites in diverse hosts during the infection cycle.

110

## 111 RESULTS

112 **Lyme borreliæ genospecies differ in their levels of transmission to wild-type but not**  
113 **complement-deficient mice and quail.** To examine tick-to-host transmission among Lyme  
114 borreliæ species, we intradermally injected wild-type BALB/c (wild-type; WT) mice with *B.*  
115 *burgdorferi* B31-5A4, *B. garinii* ZQ1, or *B. afzelii* CB43. The tissues from B31-5A4- or CB43-  
116 infected mice had significantly greater spirochete burdens than those from uninfected mice (Fig.  
117 S1A to D). In contrast, except for the bladders from two mice, bacterial burdens in the tissues of  
118 ZQ1-infected mice were below detection limits (10 bacteria per 100ng total DNA) (Fig. S1A to  
119 D). To generate ticks harboring equal loads of spirochetes, we intradermally injected each of  
120 these strains into C3-deficient BALB/c mice (C3<sup>-/-</sup>) mice, which do not have functional  
121 complement. After allowing *I. scapularis* larvae to feed on these mice, we found similar burdens  
122 of these strains in all tested tissues, fed larvae, and post molting flat nymphs (Fig. S1 E to J).

123 We then permitted the nymphs carrying each of these strains to feed on WT mice and  
124 determined the spirochete burdens in the replete nymphs, the skin at the tick bite site, and blood  
125 from these animals at 7 days post feeding (dpf), and uninfected nymphs were included as control.  
126 Strains B31-5A4 and CB43 survived at these sites (~10<sup>3</sup> spirochetes per tick or 10<sup>2</sup> to 10<sup>3</sup>  
127 spirochetes per 100ng DNA of tissues, Fig. 1A to C). Two out of six fed nymphs had

128 undetectable loads of ZQ1 whereas the other four ticks have bacterial loads ranging from 39 to  
129 111 spirochetes per tick (Fig. 1A). These low, variable values were not significantly different  
130 compared to uninfected nymphs (Fig. 1A,  $p = 0.52$ ). Strain ZQ1 was also largely undetectable in  
131 tick bite sites and blood (three and five out of five bite sites and blood samples, respectively; Fig.  
132 1B and C). Additionally, we fed nymphs carrying B31-5A4, CB43, or ZQ1 on  $C3^{-/-}$  mice and  
133 found that these strains were detected in fed nymphs, bite sites, and blood at similar levels (Fig.  
134 1D to F). These results indicate that ZQ1 is less capable of surviving in fed nymphs and  
135 establishing infection than B31-5A4 and CB43 after ticks fed only on WT mice, but not on the  
136 mice lacking C3, suggesting that mouse complement dictates spirochete transmission. We further  
137 studied the tickborne transmission of these strains in a similar fashion using *Coturnix* quail, the  
138 avian model of Lyme disease (26, 27). We detected B31-5A4 and ZQ1 in fed nymphs, tick bite  
139 sites, and bloodstream ( $\sim 10^4$  spirochetes per tick or  $10^2$  to  $10^3$  Lyme borreliae per 100ng DNA of  
140 tissues, Fig. 1G to I). Conversely, strain CB43 was not detected above the detection limit in these  
141 ticks and tissue samples (Fig. 1G to I). When the nymphs carrying each of these strains were  
142 allowed to feed on quail treated with *O. moubata* complement inhibitor (OmCI), which blocks  
143 quail complement at the level of activation of C5 (Fig. S2)(28), we found similar levels of  
144 spirochetes in fed nymphs, tick bite sites and blood (Fig. 1J to L). These data showed less  
145 efficient tick-to-quail transmission of CB43 than that of B31-5A4 and ZQ1, and as was the case  
146 in mice, quail complement dictates transmission efficiency among those spirochete strains.

147

148 **The different abilities of Lyme borreliae genospecies to evade complement in tick blood**  
149 **meals determine mammalian- or avian-specific spirochete transmission.** To examine the role  
150 that the source of the blood meals plays in determining spirochete transmission, nymphs infected

151 with B31-5A4, ZQ1, or CB43 were allowed to feed on artificial feeding chambers with human  
152 blood, the mammalian blood representative (29)(Fig. 2A). Uninfected nymphs were included as  
153 controls. We found that B31-5A4 and CB43 survive in fed nymphs and blood ( $\sim 10^3$  spirochetes  
154 per tick and  $10^2$  spirochetes per 100 ng DNA of blood, Fig. 2B and C). In contrast, ZQ1 was  
155 undetectable in the majority of human blood-fed nymphs (six out of ten ticks) (Fig. 2B).  
156 Similarly, none of the blood samples fed on by ZQ1-infected nymphs had spirochete burdens  
157 significantly greater than uninfected blood (Fig. 2C). We also allowed nymphs carrying B31-  
158 5A4, ZQ1, or CB43 to feed on human blood treated with Cobra Venom Factor (CVF), which  
159 depletes human complement cascade from the level of C3 (30). We found similar burdens of  
160 these strains in the fed nymphs and the blood samples ( $\sim 10^3$  spirochetes per tick and  $\sim 10^2$   
161 spirochetes per 100 ng DNA of blood, Fig. 2D and E). These results indicate that ZQ1 is less  
162 competent than B31-5A4 or CB43 to survive in the tick blood meals from humans during  
163 transmission, and active human complement in the blood meals drives survival differences. We  
164 also performed similar work using quail blood and detected the strains B31-5A4 and ZQ1 in fed  
165 nymphs and blood ( $\sim 10^3$  spirochetes per tick and  $\sim 10^2$  spirochetes per 100ng total DNA of  
166 blood, Fig. 2F and G). However, the strain CB43 was not detected in the majority of fed nymphs  
167 (7 out of 13 nymphs, Fig. 2F;  $P > 0.05$  compared to uninfected nymphs). Further, spirochete  
168 burden values in blood samples fed on by nymphs carrying CB43 were indistinguishable from  
169 those of uninfected blood samples (Fig. 2G). Similar levels of each strain were observed when  
170 nymphs carrying each of these strains were fed on OmCI-treated quail blood ( $\sim 10^3$  spirochetes  
171 per tick and  $10^2$  spirochetes per 100 ng DNA of blood, Fig. 2H and I). These findings indicate  
172 that quail complement limits CB43 survival when ticks feed on quail blood.

173



174 **CspA-mediated quail FH-binding activity promotes tick-to-quail transmission of**  
175 **spirochetes by complement evasion.** We previously showed that a *cspA*-deficient mutant *B.*  
176 *burgdorferi* producing a spirochete outer surface protein, CspA, from the *B. burgdorferi* B31  
177 (CspA<sub>B31</sub>) or *B. afzelii* PKO (CspA<sub>PKO</sub>) but not from *B. garinii* ZQ1 (CspA<sub>ZQ1</sub>), facilitates tick-to-  
178 mouse transmission by surviving in fed nymphs (21). This isogenic strain-specific transmission  
179 is dependent on the mouse FH-binding activity of these CspA variants to evade complement (21)  
180 (Table 1) and recapitulates the mouse-specific tickborne transmissibility of *B. burgdorferi* B31,  
181 *B. afzelii* CB43, and *B. garinii* ZQ1 (Fig. 1). (Note that CspA from *B. afzelii* CB43 (CspA<sub>CB43</sub>)  
182 shares 99% amino acid identity with CspA<sub>PKO</sub>, making these CspA variants likely confer similar  
183 FH-binding and transmission phenotypes (Fig. S3A)). To extend that isogenic strain-specific  
184 phenotype to other small mammals, we allowed nymphs carrying the that *cspA*-deficient *B.*  
185 *burgdorferi* producing CspA<sub>B31</sub>, CspA<sub>PKO</sub>, or CspA<sub>ZQ1</sub> to feed on a rodent reservoir of Lyme  
186 borreliae, *Peromyscus leucopus*. We found that expression of CspA<sub>B31</sub> and CspA<sub>PKO</sub>, but not  
187 CspA<sub>ZQ1</sub>, permitted spirochete transmission to that rodent species (Fig. S4). Further, our previous  
188 findings of CspA<sub>ZQ1</sub> (and CspA<sub>B31</sub>) binding to quail FH and promoting survival in quail serum  
189 raised the hypothesis that CspA variants that bound FH drives tick-to-quail transmission (21)  
190 (Table 1). To test this hypothesis, quail were fed on by the nymphs carrying WT *B. burgdorferi*  
191 B31-5A15 (5A15), *B. burgdorferi* B31-5A4NP1 $\Delta$ *cspA* harboring an empty vector  
192 ( $\Delta$ *cspA*/Vector), or the *cspA*-deficient strain carrying plasmids to express CspA<sub>B31</sub>, CspA<sub>ZQ1</sub>, or  
193 CspA<sub>PKO</sub> in the background of B31-5A4NP1 $\Delta$ *cspA*. We also included an isogenic strain  
194 producing CspA<sub>B31</sub>-L246D, a CspA<sub>B31</sub> mutant selectively devoid of quail FH-binding activity  
195 (21) (Table 1). Uninfected ticks were included as control. The strain 5A15 but not  $\Delta$ *cspA*/Vector  
196 or *cspA*<sub>B31</sub>-L246D-complemented strain, had burdens above detection limits in the fed nymphs,

197 tick bite sites and blood (Fig. 3A to C). Strains producing CspA<sub>B31</sub> or CspA<sub>ZQ1</sub> but not CspA<sub>PK0</sub>,  
198 had detectable burdens in the fed nymphs or tick bite sites and blood ( $\sim 10^4$  spirochetes per tick  
199 and  $\sim 10^2$  spirochetes per 100 ng DNA of tissues or blood, Fig. 3A to C). In contrast, when  
200 nymphs carrying each of these spirochete strains were permitted to feed on OmCI-treated quail,  
201 all strains showed comparable burdens in fed nymphs, tick bite sites, and blood (Fig. 3D to F).  
202 These findings suggest that the CspA<sub>ZQ1</sub> and CspA<sub>B31</sub> as quail FH binders promote tick-to-quail  
203 transmission by evading complement, and CspA-mediated quail FH-binding activity dictates  
204 such a transmission.

205  
206 **Allelically variable, CspA-mediated FH-binding activity confers spirochete complement**  
207 **evasion in tick blood meals and transmissibility in a mammalian and avian blood-specific**  
208 **manner.** We sought to examine whether CspA-mediated FH-binding activity facilitates  
209 spirochete evasion of complement in tick blood meals, and if that ability determines tickborne  
210 transmission in a host-specific manner. Human blood was allowed to be ingested by the nymphs  
211 carrying 5A15,  $\Delta cspA$ /Vector, or this strain producing CspA<sub>B31</sub>, CspA<sub>ZQ1</sub>, CspA<sub>PK0</sub>, or CspA<sub>B31</sub>-  
212 L246D using feeding chambers. We detected 5A15, but not  $\Delta cspA$ /Vector or CspA<sub>B31</sub>-L246D-  
213 producing strains, in fed nymphs and blood (Fig. 4A and B). The CspA<sub>B31</sub>- or CspA<sub>PK0</sub>-  
214 producing strains were found in fed nymphs and in human blood ( $\sim 10^4$  spirochetes per tick (Fig.  
215 4A) and more than 10 spirochetes per 100 ng total DNA of blood (Fig. 4B)). Conversely, the  
216 CspA<sub>ZQ1</sub>-producing strain was not detectable in these samples (Fig. 4A and B). When we  
217 allowed nymphs carrying the same strains to feed on CVF-treated human blood, all strains were  
218 detected at similar burdens in fed nymphs and blood (Fig. 4C and D). These results suggest that  
219 CspA<sub>B31</sub> and CspA<sub>PK0</sub>, but not CspA<sub>ZQ1</sub>, permitted transmission to human blood by facilitating

220 human FH-binding mediated complement evasion in tick blood meals. We also permitted the  
221 nymphs carrying the above-mentioned strains to feed on quail blood in the same fashion and  
222 found B31-5A15, but not  $\Delta cspA$ /Vector or CspA<sub>B31</sub>-L246D, in the fed nymphs and blood had  
223 detectable burdens in both nymphs and blood (Fig. 4E and F). The CspA<sub>B31</sub>- or CspA<sub>ZQ1</sub>-  
224 producing strain was readily detected in fed nymphs and blood (Fig. 4E and F). Though three  
225 and two ticks carrying the CspA<sub>PK0</sub> and CspA<sub>B31</sub>-L246D-producing strain, respectively, had  
226 burdens greater than detection limits, we did not detect any spirochetes in the remaining 10  
227 nymphs (Fig. 4E). Additionally, the burdens of these strains in the blood were statistically  
228 indistinguishable from uninfected blood samples (Fig. 4F). When we performed similar  
229 experiments using OmCI-treated quail blood, all strains were found in nymphs and blood at  
230 comparable levels (Fig. 4G and H). These results show the contribution of quail FH-binding  
231 dependent complement evasion in tick blood meals in promoting transmission to quail blood, and  
232 CspA<sub>B31</sub> and CspA<sub>ZQ1</sub>, but not CspA<sub>PK0</sub>, conferred these activities.

233

234 **CspA homologs showed discontinuous sequence variation and genospecies-specific**  
235 **polymorphisms.** Given the finding that homologous CspA proteins from single strains of *B.*  
236 *burgdorferi*, *B. afzelii*, or *B. garinii* confer distinct host tropism, we examined CspA variation in  
237 publicly available sequences. CspA is nested in the fourth clade of a protein family encoded on  
238 the linear plasmid 54, lp54 (PFam54-IV) (41-81% nucleotide identity; Fig. 5A) (31, 32).  
239 However, the homology of all PFam54-IV proteins makes it difficult to easily identify CspA  
240 variants, leading to inaccurate annotations and misidentification (31). We thus compiled publicly  
241 available gene sequences encoding PFam54-IV available in GenBank from *B. burgdorferi*, *B.*  
242 *afzelii*, and *B. garinii*, and compared the pairwise nucleotide identities of codon alignments for

243 these genes from each species. Within PFam54-IV-encoding genes of any one particular *B.*  
244 *burgdorferi* strain, we identified one-to-one orthologous genes based on sequence conservation  
245 (>95% identity, green in Fig. S5). In contrast, we found moderate conservation among PFam54-  
246 IV homologs lacking such one-to-one orthology (<81% identity, red and yellow in Fig. S5).  
247 Sequence divergence patterns (inlets in Fig. S5-S7) allowed us to identify genes encoding  
248 CspA<sub>B31</sub>, CspA<sub>PKo</sub>, and CspA<sub>ZQ1</sub> as CspA orthologs in *B. burgdorferi*, *B. afzelii*, and *B. garinii*,  
249 respectively. Among these CspA orthologs, intraspecific diversity (i.e. within genospecies)  
250 exceeded 93% identity, while interspecific diversity (i.e. between genospecies) varied from 67 to  
251 72% (Fig. 5B and C). These results suggest a genospecies-specific polymorphism among CspA  
252 variants, whereby variants of the same genospecies share notably high identity, while variants of  
253 different genospecies share relatively lower identities.

254

255 **Host-specific FH-binding activity of CspA variants arose through convergent evolution.** An  
256 average identity of 74% among the genes encoding CspA and other Pfam54-IV proteins raises  
257 the possibility that non-CspA members of Pfam54-IV share FH-binding functions. We thus  
258 examined the mouse (*Mus musculus*) and quail FH-binding ability of Pfam54-IV from *B.*  
259 *burgdorferi* B31-5A4, *B. afzelii* MMS, and *B. garinii* ZQ1 using ELISA. Note that PFam54-IV  
260 members from *B. afzelii* MMS, PKo, and CB43 are nearly identical (>99% identity) (Fig. S3A  
261 and S6). We used Pfam54-IV of MMS to represent these proteins of *B. afzelii* given that the  
262 recombinant version of these proteins from MMS had been generated in our previous work (24).  
263 As expected, PFam54-IV from *B. burgdorferi* B31-5A4, *B. afzelii* MMS, and *B. garinii* ZQ1 did  
264 not bind to BSA (Fig. 6A). We found that CspA<sub>B31</sub> and CspA<sub>MMS</sub> bound to mouse FH at levels  
265 greater than a negative control spirochete protein, DbpA (21) (Fig. 6B). Despite a high

266 concentration (2  $\mu$ M) of other recombinant Pfam54-IV used, none bound to mouse FH over  
267 baseline levels seen with DbpA (Fig. 6B). Furthermore, we observed that CspA<sub>B31</sub> and CspA<sub>ZQ1</sub>,  
268 but none of other tested Pfam54-IV, bound to quail FH (Fig. 6C). These results indicate that the  
269 host-specific and allelically variable FH-binding activity of Pfam54-IV is CspA-dependent.

270 To further study the evolutionary mechanisms leading to host-specific and allelically variable  
271 FH-binding activity of CspA, we estimated phylogenetic relationships among gene sequences  
272 encoding PFam54-IV from *B. burgdorferi* B31, *B. afzelii* MMS, and *B. garinii* ZQ1. We found  
273 that those sequences of the same genospecies do not form monophyletic assemblages, but CspA  
274 variants grouped in separate clades with moderate to high internode branch support (Bayesian  
275 posterior probabilities (PP) of 0.81 at CspA<sub>B31</sub> and CspA<sub>MMS</sub> nodes and 0.86 at CspA<sub>MMS</sub> and  
276 CspA<sub>ZQ1</sub> nodes) (Fig. 6D). Similar branching patterns were seen when phylogenetic relationships  
277 were estimated among genes encoding PFam54-IV available on GenBank from *B. burgdorferi*,  
278 *B. afzelii*, and *B. garinii* (SH-aLRT/ultrafast bootstrap supports of 98.3/100% at CspA<sub>*B. burgdorferi*</sub>  
279 and CspA<sub>*B. afzelii*</sub> nodes and 84.4/74% at CspA<sub>*B. afzelii*</sub> CspA<sub>*B. garinii*</sub> nodes Fig. S8). We then tested  
280 the plausibility of this evolutionary scenario by placing CspA variants in the same clades (due to  
281 the same FH-binding functions, Fig. S9A, left panel) or cladding PFam54-IV variants from the  
282 same genospecies together (Fig. S9A, right panel). The results supported neither alternative  
283 phylogeny (Fig. S9B), in agreement with the phylogeny placing CspA variants in separated  
284 clades but not with every PFam54-IV protein from the same genospecies. Further, the supported  
285 phylogeny raises the possibility that CspA-mediated FH-binding activities arose from 1) a  
286 common FH-binding ancestor or 2) the convergent evolution of PFam54-IV (Fig. 6D). However,  
287 our results from maximum likelihood and parsimony-based tree-building methods, rejected the  
288 former possibility (Fig. 6D and E), indicating that the allelically variable, host-specific FH-

289 binding activity of CspA is a result of convergent evolution within PFam54-IV. Based on a  
290 chromosome mutation rate estimated in a previous study (33), such an evolution event likely  
291 occurred approximately 15,000-55,000 years before present, coinciding with the end of the last  
292 glacial maximum (Fig. 6D).

293

## 294 **DISCUSSION**

295 The constant interaction of microparasites and hosts allows the microparasites to adapt to  
296 each of the host environments, by which they can evolve to become specialists (4, 34). However,  
297 the fact that generalists are present in nature suggests that generalization of host ranges for those  
298 microparasites also confers fitness advantages (4, 34). For vector-borne microparasites, the  
299 process leading to host tropism can be driven by host-derived components (i.e. immune  
300 molecules or nutrients) either in the hosts or acquired by vectors (4). The molecular determinants  
301 and evolutionary mechanisms by which microparasites specialize or generalize to be associated  
302 with hosts are largely unclear. Reflected by the variable host tropism of different spirochete  
303 genospecies transmitted through *Ixodes* ticks, the Lyme disease bacterium is a well-suited model  
304 to study host-microparasite interactions (9, 10). *I. scapularis* ticks were shown in laboratory  
305 infections to carry *B. burgdorferi*, *B. afzelii*, and *B. garinii* at similar levels (35, 36), suggesting  
306 the use of this tick to represent *Ixodes* vectors of Lyme disease. Using a single tick species  
307 carrying each of the tested spirochete species allows for attribution of the observations solely to  
308 host and/or pathogen determinants, the emphasis of this study. Nonetheless, *B. afzelii* and *B.*  
309 *garinii* are not endemic to North America where *I. scapularis* are found, and are thus isolated  
310 from other *Ixodes* ticks (i.e. *I. ricinus* and *I. persulcatus*) in the field. *B. burgdorferi* is the only  
311 Lyme borrelia genospecies in this study that is circulated in *I. scapularis* in nature (5). Thus,

312 utilizing *I. scapularis* as a vector representative may not completely address the role of vector  
313 competence in modulating host tropism of spirochetes (37, 38), which warrants further  
314 investigations. Additionally, Lyme borreliae-infected mice have commonly been used to  
315 generate nymphs harboring spirochetes through blood feeding by naïve larvae (39). However,  
316 rearing nymphs carrying similar burdens of each spirochete species in this fashion is difficult  
317 because wild-type mice do not maintain equal loads of these spirochetes (40, 41). Using  
318 complement-deficient mice ( $C3^{-/-}$  mice), we found similar burdens of *B. burgdorferi* B31-5A4,  
319 *B. afzelii* CB43, and *B. garinii* ZQ1 in fed larvae, post-molting flat nymphs, and the tissues  
320 derived from spirochete-infected mice. This result provides a strategy to overcome the difficulty  
321 in tick-rearing and infection, and supports the concept that complement controls the spirochete  
322 infectivity during infection (21, 40, 42).

323 No definitive studies have been performed to test the long-held model that complement evasion  
324 by spirochetes determines Lyme borreliae host tropism (43). A hurdle for such an investigation is  
325 the inability to easily maintain and/or persistently infect non-mammalian hosts, such as birds  
326 (44-54). Though some wild-birds have been brought into laboratories to study spirochete  
327 infectivity (44-54), molecular mechanisms have not been elucidated because of the lack of avian-  
328 specific reagents. We and others have intradermally inoculated Lyme borreliae into *Coturnix*  
329 quail as this domestic bird can sustain detectable spirochete burdens for more than eight weeks  
330 (26, 27). We thus allowed ticks carrying spirochetes to feed on quail, similar to previous work  
331 performed in this species and other domestic aves (55-57). We found that *B. garinii* ZQ1 and *B.*  
332 *burgdorferi* B31-5A4 survive in fed ticks and are transmitted to quail whereas *B. afzelii* CB43  
333 did not. These results demonstrate that the genospecies variation of spirochete transmissibility to  
334 birds, in agreement with prior studies [reviewed in (9)], supporting the use of quail as an avian

335 host representative. In contrast, when nymph feeding was performed on wild-type mice, *B.*  
336 *afzelii* CB43 and *B. burgdorferi* B31-5A4 survived in fed ticks and migrated to these animals  
337 while *B. garinii* ZQ1 did not. All three species survived in fed ticks and are transmitted to  
338 complement-deficient quail or mice. In support of previous *in vitro* evidence (43, 58), this study  
339 establishes complement evasion by spirochetes as a driver of Lyme borreliae host tropism. As  
340 the presence of complement in vertebrate blood, our findings raise a possibility that spirochetes  
341 must evade host complement specifically in the blood meal. However, tick feeding on live  
342 animals may introduce confounding factors of blood meal-independent, complement-mediated  
343 clearance (59). Using different sources of blood in “artificial feeding chambers” without the  
344 involvement of animals allows us to demonstrate that spirochete evasion to complement in blood  
345 meals dictates Lyme borreliae host tropism (29).

346 Both *Ixodes* ticks and Lyme borreliae produce complement-inactivating proteins to facilitate  
347 feeding and pathogen transmission (8, 60-62). Supported by many Lyme borreliae proteins are  
348 polymorphic, one attractive hypothesis is that polymorphisms in these proteins contribute to host  
349 tropism. Regrettably, using wild-type spirochete strains may not delineate the contribution these  
350 proteins individually because these spirochetes generate multiple polymorphic complement-  
351 inactivating proteins during transmission (22, 63-66). Thus, identical spirochete background  
352 strains have been used to express genes or alleles (also known as “isogenic strains”) to define  
353 bacterial determinants of particular phenotypes (21) (67, 68). We have previously shown that  
354 isogenic strains in a *cspA*-deficient background producing CspA from *B. burgdorferi* B31 or *B.*  
355 *afzelii* PKo, but not *B. garinii* ZQ1, promote tick-to-mouse transmission. The ability of ticks to  
356 transmit Lyme borreliae is contingent on the ability of the spirochete to survive in fed ticks,  
357 consistent with the phenotypes observed using wild-type genospecies (21). Such differential



358 transmissibility depends on the ability of CspA to bind to mammal FH in the presence of mouse  
359 complement, leading to the possibility that allelically-variable, CspA-mediated FH-binding  
360 activity dictates host tropism (21, 24, 25). Nonetheless, that concept requires identification of the  
361 animals that are susceptible to Lyme borreliae that express ZQ1-derived CspA. In agreement  
362 with our previous work showing CspA from ZQ1 and B31 but not PKo binds to quail FH (21),  
363 we found the ZQ1- and B31- (but not PKo-) derived CspA facilitates tick-to-quail transmission  
364 of spirochetes. We further showed that such an allele-dependent, quail-specific transmission is  
365 determined by the presence of quail complement and the ability of CspA to bind to this species'  
366 FH. Our results using feeding chambers, isogenic bacterial strains and complement-intact or -  
367 deficient human or quail blood demonstrated that CspA is a determinant of Lyme borreliae host  
368 tropism by promoting host-specific, FH-binding-dependent complement evasion in tick blood  
369 meals.

370 CspA, like other Pfam54-IV proteins, experienced numerous events of duplications and  
371 deletions, resulting in moderate identity (~40-80%) among the variants in this protein family  
372 (31, 32, 69). These observations suggest rapid evolution, potentially indicating novel functions in  
373 this region (31, 32, 70). This notion is supported by some important functions (e.g. complement  
374 evasion, cell adhesion, plasminogen binding, and tissue colonization) identified for CspA and  
375 other Pfam54 proteins (21, 71-74). However, the moderate sequence similarity from limited  
376 number of strains in those studies makes it difficult to definitively determine the one-to-one  
377 orthologs of each Pfam54-IV member (31, 32), creating hurdles to further investigate the  
378 evolutionary mechanisms giving rise to those functions. By comparing the sequences that encode  
379 PFam54-IV from different strains within each genospecies, we found that some comparisons  
380 showed moderate identity (<80%), while others shared a high degree of identity (~90% or more).

381 These results allow us to define these highly similar sequences as paralogs. These findings also  
382 suggest that the phenotypes conferred by one Pfam54-IV protein (e.g. host-specific FH-binding  
383 activity/transmissibility) are likely shared by its orthologs from different strains within the same  
384 genospecies (75). Additionally, we observed notably less identity (<79%) when comparing genes  
385 encoding Pfam54-IV among different spirochete genospecies, indicating genospecies-specific  
386 polymorphisms. These results, combined with the fact that CspA variants confer variable  
387 complement evasion and host tropism (21, 24, 25), are similar to findings of allelically-variable  
388 phenotypes in other Lyme borreliae polymorphic proteins (65, 67, 68). Further, these data  
389 suggest that any unidentified functions of CspA or other Pfam54-IV may vary among the strains  
390 from different genospecies.

391 Some phenotypes are shared among multiple Pfam54-IV proteins from the same Lyme  
392 borreliae genospecies (e.g. C7 and C9 binding-mediated complement evasion by Bga66 and  
393 Bga72 from *B. bavariensis*) (71). This finding raises the possibility that FH-binding is a common  
394 feature for non-CspA Pfam54-IV proteins within the same genospecies. However, our finding  
395 showing no detectable mouse or quail FH-binding to non-CspA Pfam54-IV indicates that the  
396 FH-binding activity is unique to CspA, in agreement with the results of human FH-binding  
397 activity of Pfam54-IV (24). Further, our data from phylogenetic reconstructions rejected the  
398 possibility of functional cladding of CspA or a common FH-binding ancestor, but supported  
399 convergent evolution as the mechanism leading to such an allelically variable, CspA-mediated  
400 FH-binding activity (76). With the fact that such an activity dictates Lyme borreliae host tropism,  
401 allelically variable, CspA-mediated FH-binding activity would effectively isolate different  
402 populations of Lyme borreliae in their respective hosts in nature, resulting in adaptive radiation  
403 of spirochetes. An intriguing question is whether such adaptation is the result of allopatric

404 ecological speciation of the Lyme borreliae (77-82). However, the phylogenetic reconstruction of  
405 Pfam54-IV suggests that CspA of *B. burgdorferi* evolved approximately 15,000 to 55,000 years  
406 ago. The emergence of the CspA variants thus likely occurred after ancient Lyme borreliae  
407 speciation as the earliest common ancestor of *B. burgdorferi* in North America was dated at ~  
408 60,000 years ago (33). Rather, that timeline of CspA emergence (~15,000-55,000 years ago)  
409 coincides with the latter half of the last glacial maximum in North America and Europe (83, 84).  
410 An attractive possibility can be considered that massive climatic changes triggered ecological  
411 shifts necessitating new strategies to be maintained in the enzootic cycle, such as allelically  
412 variable, CspA-mediated FH-binding activity. Using the Lyme disease bacterium as a model,  
413 this work is a pioneering study defining the mechanisms that dictate host tropism of  
414 microparasites, identifying the molecular determinants, and elucidating the evolutionary drivers  
415 of such host-microparasite associations. These findings will provide significant impacts into the  
416 origin of a vector-borne enzootic cycle and establish the groundwork for future studies to  
417 investigate the mechanisms in shaping host-microparasite interaction.

418

## 419 **MATERIALS AND METHODS**

420 **Ethics statement.** All mouse and quail experiments were performed in strict accordance with  
421 all provisions of the Animal Welfare Act, the Guide for the Care and Use of Laboratory  
422 Animals, and the PHS Policy on Humane Care and Use of Laboratory Animals. The protocol  
423 was approved by the Institutional Animal Care and Use Committee (IACUC) of Wadsworth  
424 Center, New York State Department of Health (Protocol docket number 19-451) and Columbia  
425 University (Protocol docket number AC-AAAO4551). All efforts were made to minimize  
426 animal suffering.

427

428 **Mouse, quail, tick, bacterial strains, OmCI, and FH.** BALB/c mice were purchased from  
429 Taconic (Hudson, NY). C3<sup>-/-</sup> mice in BALB/c background were generated from the C3<sup>-/-</sup>  
430 (C57BL/6) purchased from Jackson Laboratory (Bar Harbor, ME) as described in our previous  
431 study (21). *P. leucopus* mice were ordered from *Peromyscus* genetic stock center at University  
432 of South Carolina (Columbia, SC). *Ixodes scapularis* tick larvae were purchased from National  
433 Tick Research and Education Center, Oklahoma State University (Stillwater, OK) or obtained  
434 from BEI Resources (Manassas, VA). Lyme borreliae-infected nymphs were generated as  
435 described in the section “Generation of ticks carrying Lyme borreliae.” The *Borrelia* and  
436 *Escherichia coli* strains used in this study are described in Table S1. *E. coli* strains DH5 $\alpha$ , M15,  
437 and derivatives were grown in Luria-Bertani (BD Bioscience) broth or agar, supplemented with  
438 kanamycin (50  $\mu$ g/ml), ampicillin (100  $\mu$ g/ml), or no antibiotics as appropriate. All *B.*  
439 *burgdorferi*, *B. afzelii*, and *B. garinii* strains were grown in BSK-II completed medium  
440 supplemented with kanamycin (200  $\mu$ g/mL), streptomycin (50  $\mu$ g/mL), gentamicin (50  $\mu$ g/mL),  
441 or no antibiotics (see Table S1). Mouse FH was purchased from MyBiosource. Quail FH and  
442 recombinant OmCI proteins were generated as described previously (21, 26, 28).

443

444 **Mouse infection using needle inoculation.** Four-week-old female BALB/c or C3<sup>-/-</sup> mice in  
445 BALB/c background were used for experiments involved in needle infection of Lyme borreliae  
446 strains. Mice were infected by intradermal injection as previously described (68) with 10<sup>6</sup> of *B.*  
447 *afzelii* CB43, *B. garinii* ZQ1, or *B. burgdorferi* B31-5A4. The plasmid profile of the strain  
448 B31-5A4 was verified prior to infection as described to ensure the stability of the vector and no  
449 loss of plasmids (85, 86). As the information of genome is not available for plasmid profiling,

450 the strains CB43 and ZQ1 used in this study were less than ten passages. Mice were sacrificed  
451 at 21 days post-infection, the inoculation site of the skin, the ankle joints, ears, and bladder  
452 were collected to quantitatively evaluate levels of colonization during infection as described in  
453 the section “Determination of Lyme borreliae burdens in infected ticks, tissues and blood  
454 samples.”.

455

456 **Generation of ticks carrying Lyme borreliae.** The procedure of the tick infection has been  
457 described previously (21, 87). Basically, four-week-old male and female C3<sup>-/-</sup> mice in BALB/c  
458 background were infected with 10<sup>6</sup> of *B. afzelii* CB43, *B. garinii* ZQ1, or *B. burgdorferi* B31-  
459 5A4, B31-5A15, B31-5A4NP1Δ*cspA*-V or this *cspA* mutant strain producing CspA<sub>B31</sub>,  
460 CspA<sub>PKo</sub>, CspA<sub>ZQ1</sub>, or CspA<sub>B31</sub>L246D by intradermal injection as described above. The ear  
461 punches from those mice were collected at 13 days post infection, and DNA was extracted to  
462 perform qPCR using *Borrelia* 16S rRNA primers as previously described (26) (Table S2) to  
463 confirm the infection (See section “Determination of Lyme borreliae burdens in infected ticks,  
464 tissues and blood samples.”). At 14 days post infection, the uninfected larvae were allowed to  
465 feed to repletion on those spirochete-infected mice as described previously (21, 87).  
466 Approximately 100 to 200 larvae were allowed to feed on each mouse. The engorged larvae  
467 were collected and allowed to molt into nymphs in a desiccator at room temperature and 95%  
468 relative humidity in a room with light dark control (light to dark, 16:8 h). (21, 85).

469

470 **Serum resistance assays.** *Coturnix* quail were subcutaneously injected with OmCI (1 mg/kg of  
471 quail) or PBS buffer, and the sera were collected at 6, 24, 48, 72, and 96 h post injection. A  
472 serum sensitive, high passaged *B. burgdorferi* strain B313 was cultivated to mid-log phase,

473 followed by being diluted to a final concentration of  $5 \times 10^6$  bacteria/ml in BSKII medium  
474 without rabbit serum. These bacteria were then incubated with each of these quail serum  
475 samples (final concentration: 40% of serum). We also included the bacteria mixed with heat  
476 inactivated serum samples, which have been incubated at 56°C for 2 h prior to being mixed  
477 with spirochetes. An aliquot was taken from each reaction at 0 and 4 h post injection to  
478 determine the number of motile bacteria under a Nikon Eclipse E600 darkfield microscope, as  
479 previously described (21). The survival percentage for those motile spirochetes was calculated  
480 using the number of mobile spirochetes at 4 h post incubation normalized to that at the very  
481 beginning of incubation with serum.

482

483 **Mouse, quail, and *P. leucopus* infection by ticks.** The flat nymphs were placed in a chamber  
484 on four- to six-week old male and female BALB/c or C3<sup>-/-</sup> mice in BALB/c background, and  
485 the engorged nymphs were collected from the chambers at seven days post nymph feeding as  
486 described (88). For ticks feeding on quail, the feathers located on the back of quail's neck were  
487 plucked to expose approximately 2 to 3 cm<sup>2</sup> of skin, close to the back of its head. 1.2 mL  
488 screw-top 'cryo' microcentrifuge vials (ThermoFisher Scientific) were cut to be used as mini  
489 chambers. The top of the caps from the chambers was pierced with a 25-gauge needle to create  
490 air holes, and sand papers were used to smooth any sharp edges along the cut surface edge of  
491 these chambers. Vetbond Tissue Adhesive (3M) was used to attach the chambers onto the  
492 exposed quail skin followed by manually restraining quail while the surgical glue dries (1-2  
493 min). Ten nymphs were placed into the chambers on mice or quail, which those ticks to feed on.  
494 For OmCI-treated quail, the quail were subcutaneously injected with OmCI (1 mg/kg of quail)  
495 a day prior to the nymph feeding. The engorged nymphs were obtained from the chambers. The

496 mice and quail were placed into a small cage, which then placed above the moat in a larger  
497 cage (for mice) or plastic bin (for quail). Ticks feeding on *Peromyscus leucopus* mice have  
498 been described previously (89, 90). Ten nymphs were placed in the ears of each mouse, five  
499 nymphs per ear and were allowed to feed until repletion. *P. leucopus* mice were separately  
500 placed in water cages which consisted of the cage being filled with approximately 2.5 cm of  
501 water along the bottom, a wire rack to keep the mouse out of the water, and then being placed  
502 in a larger hamster cage with water to prevent ticks from escaping. The engorged nymphs were  
503 recovered from the water cage beginning five days post nymph feeding. Blood and tick  
504 placement site from quail, mice, and *P. leucopus* mice were collected at seven days post nymph  
505 feeding.

506

507 **Feeding chamber assays by ticks.** Artificial feeding chambers were prepared as described in  
508 our previous study (21). In short, the silicone rubber-saturated rayon membrane was generated  
509 as described (21), with the exception of adhering fiberglass mesh (3-mm pore; Lowe's Inc.) to  
510 the membrane before attaching it to the rest of the chamber. Such membrane was attached to  
511 one side of a 2-cm length of polycarbonate tubing (hereafter called the chamber; inner diameter:  
512 2.5 cm; outer diameter: 3.2 cm; (Amazon Inc.), as described, with the exception of using a  
513 rubber band to hold the chamber in place instead of a rubber O-ring (21). Feeding stimuli  
514 including hair and hair extract from white-tailed deer (*Odocoileus virginianus*) and a plastic tile  
515 spacer (Lowe's Inc.) were added as described with the exception of using 3 stainless steel  
516 bearings (Amazon Inc.) instead of a nickel coin (21). *I. scapularis* nymphs carrying *B.*  
517 *burgdorferi* B31-5A4, *B. afzelii* CB43, *B. garinii* ZQ1; or *B. burgdorferi* B31-5A4, B31-5A15,  
518 B31-5A4NP1 $\Delta$ *cspA*-V or this *cspA* mutant strain producing CspA<sub>B31</sub>, CspA<sub>PK0</sub>, CspA<sub>ZQ1</sub>, or

519 CspA<sub>B31</sub>L246D were then added onto the chamber (5-8 ticks/chamber). Chamber feedings were  
520 carried out as previously described using human (BioIVT, Westbury, NY) or quail blood  
521 (Canola Poultry Market, Brooklyn, NY) (Fig. 2A). Chambers in blood were placed in a sealed  
522 Styrofoam cooler with wet paper towels to maintain humidity at approximately 87 to 95%.  
523 Depending on the experiments, blood was treated with CVF (ComTech) or OmCI to a final  
524 concentration of 17 µg/ml. Blood was changed daily, and was collected along with ticks after 5  
525 days of feeding. SYBR-based qPCR was used to determine bacterial burdens in the ticks and  
526 blood using *Borrelia* 16S rRNA gene primers (Table S2).

527

528 **Determination of Lyme borreliae burdens in infected ticks, tissues and blood samples.** The  
529 ticks fed on quail, mice, *P. leucopus* mice, or feeding chambers were homogenized by hand in  
530 a 1.5 ml Eppendorf tube (Eppendorf) with a plastic pestle (ThermoFisher Scientific). The DNA  
531 from tissues or blood or homogenized ticks was extracted using the EZ-10 Genomic DNA kit  
532 (Biobasic). The quantity and quality of DNA was assessed using a Nanodrop 1000 UV/Vis  
533 spectrophotometer (ThermoFisher Scientific). The 280:260 ratio was between 1.75 and 1.85,  
534 indicating the lack of contaminating RNA or proteins. qPCR was then performed to quantitate  
535 bacterial loads. Spirochete genomic equivalents were calculated using an ABI 7500 Real-Time  
536 PCR System (ThermoFisher Scientific) in conjunction with PowerUp SYBR Green Master Mix  
537 (ThermoFisher Scientific), based on amplification of the Lyme borreliae 16S rRNA gene using  
538 primers 16SrRNAfp and 16SrRNArp (Table S2), as described previously (23, 68). Cycling  
539 parameters for SYBR green-based reactions were 50°C for 2 min, 95°C for 10 min, and 45  
540 cycles of 95°C for 15 s, 55°C for 30 s, and 60°C for 1 min. The number of 16S rRNA copies  
541 was calculated by establishing a threshold cycle (C<sub>q</sub>) standard curve of a known number of 16S



542 rRNA gene extracted from *B. burgdorferi* strain B31-5A4, then comparing the Cq values of the  
543 experimental samples.

544

545 **Sequence analysis of PFam54-IV.** Nucleotide sequences of the PFam54-IV genes, including  
546 *bba68* (*cspA<sub>B31</sub>*), and *bba69* from *B. burgdorferi* B31 (AE000790), *pkoa0062*, *pkoa0063*,  
547 *pkoa0064*, *pkoa0065*, *pkoa0066*, and *pkoa0067* (*cspA<sub>PKo</sub>*), from *B. afzelii* PKo (CP002950),  
548 and *zqa67*, *zqa68* (*cspA<sub>ZQ1</sub>*), *zsa69*, *zsa70*, *zsa71*, and *zsa72* from *B. garinii* ZQ1 (AJ786369),  
549 were used as queries against the NCBI GenBank nr database using BLASTN(91). Sequences  
550 from organisms other than *B. burgdorferi*, *B. afzelii*, and *B. garinii* and duplicate sequences  
551 were discarded. The remaining sequences were then adjusted to include the full open reading  
552 frames with removal of any sequences containing premature stop codons. Sequences were  
553 grouped by species, and the sequences of the genes encoding the third and fifth clade of  
554 PFam54 (PFam54-III and Pfam54-V, respectively) from *B. burgdorferi* B31, *B. afzelii* PKo,  
555 and *B. garinii* ZQ1 were added to the sequence set (Genbank accession codes are found on on  
556 Fig. S5 to S7). Codon alignments were generated using T-Coffee on the TranslatorX server  
557 (92, 93), followed by calculation of pairwise identity in Clustal Omega (94). Only Pfam54-IV  
558 best hits were kept. The remaining sequences were then realigned by codon and pairwise  
559 identity was calculated as above. The percent identity between each of these genes and each of  
560 the identified PFam54-IV alleles is shown in Fig. S5 to S7.

561

562 **Generation of recombinant PFam54 proteins.** The pQE30Xa vectors encoding the open  
563 reading frames lacking the putative signal sequences of *bba68* (*cspA<sub>B31</sub>*), *bba69* from *B.*  
564 *burgdorferi* strain B31-5A4, *mmsa67*, *mmsa68*, *mmsa69*, or *mmsa70*, and *mmsa71* (*cspA<sub>MMS</sub>*)

565 from *B. afzelii* strain MMS, or *zqa67*, *zqa68* (*cspA<sub>ZQ1</sub>*), *zsa69*, *zsa70*, *zsa71*, or *zsa72* from *B.*  
566 *garinii* strain ZQ1 were obtained previously to generate recombinant histidine-tagged proteins  
567 (24). The plasmids were transformed into *E. coli* strain M15, and the plasmid inserts were  
568 sequenced using Sanger sequencing on an ABI 3730xl DNA Analyzer (ThermoFisher  
569 Scientific) at the NYSDOH Wadsworth Center ATGC Core Facility. The resulting M15  
570 derived strains were used to produce respective recombinant PFam54-IV (Table S1). The  
571 histidine-tagged PFam54-IV were produced and purified by nickel affinity chromatography  
572 with Ni-NTA agarose according to the manufacturer's instructions (Qiagen, Valencia, CA).

573

574 **FH binding assay by qualitative ELISA.** Qualitative ELISA for FH binding by PFam54-IV  
575 was performed as described (21, 95). One microgram of BSA (negative control; Sigma-Aldrich,  
576 St. Louis, MO) or FH from mouse or quail was coated onto microtiter plate wells by incubating  
577 the plate for overnight at 4°C. Then, 100 µl 2 µM of histidine-tagged DbpA from *B.*  
578 *burgdorferi* strain B31 (negative control) (96) or each of the PFam54-IV was added to the wells.  
579 Mouse anti-histidine tag 1:200× (Sigma-Aldrich, St. Louis, MO) and HRP-conjugated goat  
580 anti-mouse IgG 1:1,000× (Seracare Life Sci., Inc, Milford, MA) were used as primary and  
581 secondary antibodies, respectively, to detect the binding of histidine-tagged proteins. The plates  
582 were washed three times with PBST (0.05% Tween 20 in PBS), and 100 µl of tetramethyl  
583 benzidine (TMB) solution (ThermoFisher Scientific) was added to each well and incubated for  
584 5 min. The reaction was stopped by adding 100 µl of 0.5% hydrosulfuric acid to each well.  
585 Plates were read at 405 nm using a Tecan Sunrise Microplate reader at five minutes after the  
586 incubation (Tecan Life science, Männedorf, Switzerland).

587

588 **Phylogenetic reconstruction.** The PFam54-IV codon alignment from *B. burgdorferi* B31, *B.*  
589 *afzelii* MMS, and *B. garinii* ZQ1 was used to generate a Bayesian phylogenetic reconstruction  
590 was carried out in BEAST v1.8.4 with a relaxed lognormal clock, an estimated mutation rate of  
591  $4.75 \times 10^{-6}$  substitutions/site/year and a coalescent Bayesian skyline model (33, 97). A Markov  
592 chain Monte Carlo chain length of 10,000,000 steps was used with a 100,000-step thinning,  
593 resulting in effective sample sizes greater than 200, an indication of an adequate chain mixing.  
594 The resulting maximum clade credibility tree was visualized in FigTree v1.4.4 (98). We  
595 evaluated alternative, competing evolutionary scenarios for PFam54-IV based on species-  
596 specific divergence, or clustering by FH-binding activity shown in Fig. S10A (99). A battery of  
597 statistical phylogenetic tests was deployed in IQ-TREE (Kishino-Hasegawa, Shimodaira-  
598 Hasegawa, Expected Likelihood Weight, and Approximately Unbiased tests)(101-104).

599

600 **Statistical analysis.** Significant differences between samples were assessed using the Mann-  
601 Whitney *U* test or the Kruskal-Wallis test with the two-stage step-up method of Benjamini,  
602 Krieger, and Yekutieli. A P-value < 0.05 (\*) or (#) was considered to be significant (105).

603

#### 604 **ACKNOWLEDGEMENTS**

605 We thank Frank Blaisdell, and Dierdre Torrisi from the Wadsworth vet sciences facility and  
606 Ashley Marcinkiewicz and Patricia Lederman for animal husbandry, Levi Poirier and Ing-Nang  
607 Wang for assistance with gene sequencing and phylogenetic reconstructions, Ashley  
608 Marcinkiewicz for critical reading of the manuscript, Patricia Rosa for sharing the unpublished  
609 observation of *B. afzelii* strain PKo, and Roxie Girardin for assistance with SDS-PAGE. We  
610 thank Wadsworth ATGC core for plasmid sequencing, Leslie Eisele of Wadsworth

611 Biochemistry and Immunology Core for HPLC performance, and Karen Chave of the  
612 Wadsworth Protein Expression Core for purifying factor H. This work was supported by NIH-  
613 U01CK000509 (DMT and MDW), NSF-IOS1755286 (DMT, MDW, SOK, ADII, LDK, TMH,  
614 and YL), DoD-TB170111, NIH-R21AI144891, NIH-R21AI146381, New York State  
615 Department of Health Wadsworth Center Start-Up Grant (TMH and YL), the Czech Science  
616 Foundation grant No. 17-21244S (ROMR), NIH R01AI121401 (PK), and the LOEWE Center  
617 DRUID Novel Drug Targets against Poverty-Related and Neglected Tropical Infectious  
618 Diseases, project C3 (PK). The funders had no role in study design, data collection and  
619 analysis, decision to publish, or preparation of the manuscript. The authors declare that the  
620 research was conducted in the absence of any commercial or financial relationships that could  
621 be construed as a potential conflict of interest.

622

## 623 **REFERENCES**

- 624 1. Kilpatrick AM, Altizer, S. Disease Ecology. Nature Education Knowledge.  
625 2010;3(10):55.
- 626 2. Killilea ME, Swei A, Lane RS, Briggs CJ, Ostfeld RS. Spatial dynamics of Lyme  
627 disease: a review. Ecohealth. 2008;5(2):167-95.
- 628 3. Douam F, Gaska JM, Winer BY, Ding Q, von Schaeuwen M, Ploss A. Genetic  
629 Dissection of the Host Tropism of Human-Tropic Pathogens. Annual review of genetics.  
630 2015;49:21-45.
- 631 4. Kurtenbach K, Hanincova K, Tsao JI, Margos G, Fish D, Ogden NH. Fundamental  
632 processes in the evolutionary ecology of Lyme borreliosis. Nature Reviews Microbiology.  
633 2006;4(9):660-9.

- 634 5. Steere AC, Strle F, Wormser GP, Hu LT, Branda JA, Hovius JW, et al. Lyme  
635 borreliosis. *Nature Reviews Disease primers*. 2016;2:16090.
- 636 6. Radolf JD, Caimano MJ, Stevenson B, Hu LT. Of ticks, mice and men: understanding  
637 the dual-host lifestyle of Lyme disease spirochaetes. *Nature Reviews Microbiology*.  
638 2012;10(2):87-99.
- 639 7. Brisson D, Drecktrah D, Eggers CH, Samuels DS. Genetics of *Borrelia burgdorferi*.  
640 *Annual review of genetics*. 2012;46:515-36.
- 641 8. Kurokawa C, Lynn GE, Pedra JHF, Pal U, Narasimhan S, Fikrig E. Interactions  
642 between *Borrelia burgdorferi* and ticks. *Nature Reviews Microbiology*. 2020;18(10):587-600.
- 643 9. Tufts DM, Hart TM, Chen GF, Kolokotronis SO, Diuk-Wasser MA, Lin YP. Outer  
644 surface protein polymorphisms linked to host-spirochete association in Lyme borreliae.  
645 *Molecular microbiology*. 2019.
- 646 10. Lin YP, Diuk-Wasser MA, Stevenson B, Kraiczy P. Complement Evasion Contributes  
647 to Lyme Borreliae-Host Associations. *Trends in parasitology*. 2020;36(7):634-45.
- 648 11. Zhou W, Brisson D. Interactions between host immune response and antigenic variation  
649 that control *Borrelia burgdorferi* population dynamics. *Microbiology (Reading)*.  
650 2017;163(8):1179-88.
- 651 12. Gomez-Chamorro A, Battilotti F, Cayol C, Mappes T, Koskela E, Boulanger N, et al.  
652 Susceptibility to infection with *Borrelia afzelii* and TLR2 polymorphism in a wild reservoir  
653 host. *Scientific reports*. 2019;9(1):6711.
- 654 13. Zipfel PF, Skerka C. Complement regulators and inhibitory proteins. *Nature Reviews*  
655 *Immunology*. 2009;9(10):729-40.

- 656 14. Blom AM. The role of complement inhibitors beyond controlling inflammation. *Journal*  
657 *of internal medicine*. 2017;282(2):116-28.
- 658 15. Jozsi M, Zipfel PF. Factor H family proteins and human diseases. *Trends in*  
659 *immunology*. 2008;29(8):380-7.
- 660 16. Ermert D, Ram S, Laabei M. The hijackers guide to escaping complement: Lessons  
661 learned from pathogens. *Molecular immunology*. 2019;114:49-61.
- 662 17. Dulipati V, Meri S, Panelius J. Complement evasion strategies of *Borrelia burgdorferi*  
663 *sensu lato*. *FEBS Letters*. 2020;594(16):2645-56.
- 664 18. Skare JT, Garcia BL. Complement Evasion by Lyme Disease Spirochetes. *Trends in*  
665 *Microbiology*. 2020.
- 666 19. Lin YP, Frye AM, Nowak TA, Kraiczy P. New Insights Into CRASP-Mediated  
667 Complement Evasion in the Lyme Disease Enzootic Cycle. *Frontiers in Cellular and Infection*  
668 *Microbiology*. 2020;10:1.
- 669 20. Kraiczy P, Stevenson B. Complement regulator-acquiring surface proteins of *Borrelia*  
670 *burgdorferi*: Structure, function and regulation of gene expression. *Ticks and Tick-borne*  
671 *Diseases*. 2013;4(1-2):26-34.
- 672 21. Hart T, Nguyen NTT, Nowak NA, Zhang F, Linhardt RJ, Diuk-Wasser M, et al.  
673 Polymorphic factor H-binding activity of CspA protects Lyme borreliae from the host  
674 complement in feeding ticks to facilitate tick-to-host transmission. *PLoS Pathogens*.  
675 2018;14(5):e1007106.
- 676 22. Kraiczy P, Hellwage J, Skerka C, Becker H, Kirschfink M, Simon MM, et al.  
677 Complement resistance of *Borrelia burgdorferi* correlates with the expression of BbCRASP-1,

- 678 a novel linear plasmid-encoded surface protein that interacts with human factor H and FHL-1  
679 and is unrelated to Erp proteins. *The Journal of Biological Chemistry*. 2004;279(4):2421-9.
- 680 23. Bykowski T, Woodman ME, Cooley AE, Brissette CA, Brade V, Wallich R, et al.  
681 Coordinated expression of *Borrelia burgdorferi* complement regulator-acquiring surface  
682 proteins during the Lyme disease spirochete's mammal-tick infection cycle. *Infection and*  
683 *Immunity*. 2007;75(9):4227-36.
- 684 24. Wallich R, Pattathu J, Kiti-ratschky V, Brenner C, Zipfel PF, Brade V, et al.  
685 Identification and functional characterization of complement regulator-acquiring surface  
686 protein 1 of the Lyme disease spirochetes *Borrelia afzelii* and *Borrelia garinii*. *Infection and*  
687 *Immunity*. 2005;73(4):2351-9.
- 688 25. Hammerschmidt C, Koenigs A, Siegel C, Hallstrom T, Skerka C, Wallich R, et al.  
689 Versatile roles of CspA orthologs in complement inactivation of serum-resistant Lyme disease  
690 spirochetes. *Infection and Immunity*. 2014;82(1):380-92.
- 691 26. Marcinkiewicz AL, Dupuis AP, 2nd, Zamba-Campero M, Nowak N, Kraiczy P, Ram S,  
692 et al. Blood treatment of Lyme borreliae demonstrates the mechanism of CspZ-mediated  
693 complement evasion to promote systemic infection in vertebrate hosts. *Cellular Microbiology*.  
694 2019;21(2):e12998.
- 695 27. Isogai E, Tanaka S, Braga IS, 3rd, Itakura C, Isogai H, Kimura K, et al. Experimental  
696 *Borrelia garinii* infection of Japanese quail. *Infection and Immunity*. 1994;62(8):3580-2.
- 697 28. Frye AM, Hart TM, Tufts DM, Ram S, Diuk-Wasser MA, Kraiczy P, et al. A soft tick  
698 *Ornithodoros moubata* salivary protein OmCI is a potent inhibitor to prevent avian  
699 complement activation. *Ticks and Tick-borne Diseases*. 2020;11(2):101354.

- 700 29. Hart T, Yang X, Pal U, Lin YP. Identification of Lyme borreliae proteins promoting  
701 vertebrate host blood-specific spirochete survival in *Ixodes scapularis* nymphs using artificial  
702 feeding chambers. *Ticks and Tick-borne Diseases*. 2018.
- 703 30. Finnie JA, Stewart RB, Aston WP. A comparison of cobra venom factor-induced  
704 depletion of serum C3 in eight different strains of mice. *Dev Comp Immunol*. 1981;5(4):697-  
705 701.
- 706 31. Wywiał E, Haven J, Casjens SR, Hernandez YA, Singh S, Mongodin EF, et al. Fast,  
707 adaptive evolution at a bacterial host-resistance locus: the PFam54 gene array in *Borrelia*  
708 *burgdorferi*. *Gene*. 2009;445(1-2):26-37.
- 709 32. Qiu WG, Martin CL. Evolutionary genomics of *Borrelia burgdorferi* sensu lato:  
710 findings, hypotheses, and the rise of hybrids. *Infection, genetics and evolution : Journal of*  
711 *Molecular Epidemiology and Evolutionary Genetics in Infectious Diseases*. 2014;27:576-93.
- 712 33. Walter KS, Carpi G, Caccone A, Diuk-Wasser MA. Genomic insights into the ancient  
713 spread of Lyme disease across North America. *Nat Ecol Evol*. 2017;1(10):1569-76.
- 714 34. O'Keeffe KR, Oppler ZJ, Brisson D. Evolutionary ecology of Lyme *Borrelia*. *Infection,*  
715 *genetics and evolution : Journal of Molecular Epidemiology and Evolutionary Genetics in*  
716 *Infectious Diseases*. 2020:104570.
- 717 35. Dolan MC, Piesman J, Mbow ML, Maupin GO, Peter O, Brossard M, et al. Vector  
718 competence of *Ixodes scapularis* and *Ixodes ricinus* (Acari: Ixodidae) for three genospecies of  
719 *Borrelia burgdorferi*. *Journal of Medical Entomology*. 1998;35(4):465-70.
- 720 36. Eisen L. Vector competence studies with hard ticks and *Borrelia burgdorferi* sensu lato  
721 spirochetes: A review. *Ticks and Tick-borne Diseases*. 2020;11(3):101359.



- 722 37. Pospisilova T, Urbanova V, Hes O, Kopacek P, Hajdusek O, Sima R. Tracking of  
723 *Borrelia afzelii* Transmission from Infected Ixodes ricinus Nymphs to Mice. Infection and  
724 Immunity. 2019;87(6).
- 725 38. Sertour N, Cotte V, Garnier M, Malandrin L, Ferquel E, Choumet V. Infection Kinetics  
726 and Tropism of *Borrelia burgdorferi* sensu lato in Mouse After Natural (via Ticks) or Artificial  
727 (Needle) Infection Depends on the Bacterial Strain. Frontiers in Microbiology. 2018;9:1722.
- 728 39. Rosa PA, Tilly K, Stewart PE. The burgeoning molecular genetics of the Lyme disease  
729 spirochaete. Nature Reviews Microbiology. 2005;3(2):129-43.
- 730 40. Lawrenz MB, Wooten RM, Zachary JF, Drouin SM, Weis JJ, Wetsel RA, et al. Effect  
731 of complement component C3 deficiency on experimental Lyme borreliosis in mice. Infection  
732 and Immunity. 2003;71(8):4432-40.
- 733 41. van Burgel ND, Balmus NC, Fikrig E, van Dam AP. Infectivity of *Borrelia burgdorferi*  
734 sensu lato is unaltered in C3-deficient mice. Ticks and Tick-borne Diseases. 2011;2(1):20-6.
- 735 42. Woodman ME, Cooley AE, Miller JC, Lazarus JJ, Tucker K, Bykowski T, et al.  
736 *Borrelia burgdorferi* binding of host complement regulator factor H is not required for efficient  
737 mammalian infection. Infection and Immunity. 2007;75(6):3131-9.
- 738 43. Kurtenbach K, De Michelis S, Etti S, Schafer SM, Sewell HS, Brade V, et al. Host  
739 association of *Borrelia burgdorferi* sensu lato--the key role of host complement. Trends in  
740 Microbiology. 2002;10(2):74-9.
- 741 44. Ginsberg HS, Buckley PA, Balmforth MG, Zhioua E, Mitra S, Buckley FG. Reservoir  
742 competence of native North American birds for the lyme disease spirochete, *Borrelia*  
743 *burgdorferi*. Journal of Medical Entomology. 2005;42(3):445-9.

- 744 45. Heylen D, Adriaensen F, Van Dongen S, Sprong H, Matthysen E. Ecological factors  
745 that determine *Ixodes ricinus* tick burdens in the great tit (*Parus major*), an avian reservoir of  
746 *Borrelia burgdorferi* s.l. International Journal for Parasitology. 2013;43(8):603-11.
- 747 46. Heylen DJA, Muller W, Vermeulen A, Sprong H, Matthysen E. Virulence of recurrent  
748 infestations with *Borrelia*-infected ticks in a *Borrelia*-amplifying bird. Scientific Reports.  
749 2015;5:16150.
- 750 47. Heylen D, Fonville M, van Leeuwen AD, Sprong H. Co-infections and transmission  
751 dynamics in a tick-borne bacterium community exposed to songbirds. Environ Microbiol.  
752 2016;18(3):988-96.
- 753 48. Heylen DJ, Sprong H, Krawczyk A, Van Houtte N, Genne D, Gomez-Chamorro A, et  
754 al. Inefficient co-feeding transmission of *Borrelia afzelii* in two common European songbirds.  
755 Scientific Reports. 2017;7:39596.
- 756 49. Norte AC, Lopes de Carvalho I, Nuncio MS, Araujo PM, Matthysen E, Albino Ramos  
757 J, et al. Getting under the birds' skin: tissue tropism of *Borrelia burgdorferi* s.l. in naturally and  
758 experimentally infected avian hosts. Microb Ecol. 2020;79(3):756-69.
- 759 50. Norte AC, Costantini D, Araujo PM, Eens M, Ramos JA, Heylen D. Experimental  
760 infection by microparasites affects the oxidative balance in their avian reservoir host the  
761 blackbird *Turdus merula*. Ticks and Tick-borne Diseases. 2018;9(3):720-9.
- 762 51. Richter D, Spielman A, Komar N, Matuschka FR. Competence of American robins as  
763 reservoir hosts for Lyme disease spirochetes. Emerging Infectious Diseases. 2000;6(2):133-8.
- 764 52. Piesman J, Dolan MC, Schriefer ME, Burkot TR. Ability of experimentally infected  
765 chickens to infect ticks with the Lyme disease spirochete, *Borrelia burgdorferi*. The American  
766 Journal of Tropical Medicine and Hygiene. 1996;54(3):294-8.

- 767 53. Olsen B, Gylfe A, Bergstrom S. Canary finches (*Serinus canaria*) as an avian infection  
768 model for Lyme borreliosis. *Microbial Pathogenesis*. 1996;20(6):319-24.
- 769 54. Burgess EC. Experimental inoculation of mallard ducks (*Anas platyrhynchos*  
770 *platyrhynchos*) with *Borrelia burgdorferi*. *Journal of Wildlife Diseases*. 1989;25(1):99-102.
- 771 55. Kurtenbach K, Peacey M, Rijpkema SG, Hoodless AN, Nuttall PA, Randolph SE.  
772 Differential transmission of the genospecies of *Borrelia burgdorferi* sensu lato by game birds  
773 and small rodents in England. *Applied and Environmental Microbiology*. 1998;64(4):1169-74.
- 774 56. Moraru GM, Goddard J, Paddock CD, Varela-Stokes A. Experimental infection of  
775 cotton rats and bobwhite quail with *Rickettsia parkeri*. *Parasites & Vectors*. 2013;6:70.
- 776 57. Kurtenbach K, Carey D, Hoodless AN, Nuttall PA, Randolph SE. Competence of  
777 pheasants as reservoirs for Lyme disease spirochetes. *Journal of Medical Entomology*.  
778 1998;35(1):77-81.
- 779 58. Kurtenbach K, Sewell HS, Ogden NH, Randolph SE, Nuttall PA. Serum complement  
780 sensitivity as a key factor in Lyme disease ecology. *Infection and Immunity*. 1998;66(3):1248-  
781 51.
- 782 59. Bernard Q, Grillon A, Lenormand C, Ehret-Sabatier L, Boulanger N. Skin Interface, a  
783 Key Player for *Borrelia* Multiplication and Persistence in Lyme Borreliosis. *Trends in*  
784 *Parasitology*. 2020;36(3):304-14.
- 785 60. Tyson K, Elkins C, Patterson H, Fikrig E, de Silva A. Biochemical and functional  
786 characterization of Salp20, an *Ixodes scapularis* tick salivary protein that inhibits the  
787 complement pathway. *Insect Mol Biol*. 2007;16(4):469-79.

- 788 61. Schuijt TJ, Hovius JW, van Burgel ND, Ramamoorthi N, Fikrig E, van Dam AP. The  
789 tick salivary protein Salp15 inhibits the killing of serum-sensitive *Borrelia burgdorferi* sensu  
790 lato isolates. *Infection and Immunity*. 2008;76(7):2888-94.
- 791 62. Schuijt TJ, Coumou J, Narasimhan S, Dai J, Deponte K, Wouters D, et al. A tick  
792 mannose-binding lectin inhibitor interferes with the vertebrate complement cascade to enhance  
793 transmission of the lyme disease agent. *Cell Host & Microbe*. 2011;10(2):136-46.
- 794 63. Kraiczy P, Skerka C, Brade V, Zipfel PF. Further characterization of complement  
795 regulator-acquiring surface proteins of *Borrelia burgdorferi*. *Infection and Immunity*.  
796 2001;69(12):7800-9.
- 797 64. Hellwage J, Meri T, Heikkila T, Alitalo A, Panelius J, Lahdenne P, et al. The  
798 complement regulator factor H binds to the surface protein OspE of *Borrelia burgdorferi*. *The*  
799 *Journal of Biological Chemistry*. 2001;276(11):8427-35.
- 800 65. Caine JA, Lin YP, Kessler JR, Sato H, Leong JM, Coburn J. *Borrelia burgdorferi* outer  
801 surface protein C (OspC) binds complement component C4b and confers bloodstream survival.  
802 *Cellular Microbiology*. 2017.
- 803 66. Garcia BL, Zhi H, Wager B, Hook M, Skare JT. *Borrelia burgdorferi* BBK32 Inhibits  
804 the Classical Pathway by Blocking Activation of the C1 Complement Complex. *PLoS*  
805 *Pathogens*. 2016;12(1):e1005404.
- 806 67. Lin YP, Tan X, Caine JA, Castellanos M, Chaconas G, Coburn J, et al. Strain-specific  
807 joint invasion and colonization by Lyme disease spirochetes is promoted by outer surface  
808 protein C. *PLoS Pathogens*. 2020;16(5):e1008516.

- 809 68. Lin YP, Benoit V, Yang X, Martinez-Herranz R, Pal U, Leong JM. Strain-specific  
810 variation of the decorin-binding adhesin DbpA influences the tissue tropism of the Lyme  
811 disease spirochete. *PLoS Pathogens*. 2014;10(7):e1004238.
- 812 69. Brangulis K, Akopjana I, Petrovskis I, Kazaks A, Tars K. Structural analysis of the  
813 outer surface proteins from *Borrelia burgdorferi* paralogous gene family 54 that are thought to  
814 be the key players in the pathogenesis of Lyme disease. *Journal of Structural Biology*.  
815 2020;210(2):107490.
- 816 70. Kondrashov FA, Rogozin IB, Wolf YI, Koonin EV. Selection in the evolution of gene  
817 duplications. *Genome Biology*. 2002;3(2):RESEARCH0008.
- 818 71. Hammerschmidt C, Klevenhaus Y, Koenigs A, Hallstrom T, Fingerle V, Skerka C, et  
819 al. BGA66 and BGA71 facilitate complement resistance of *Borrelia bavariensis* by inhibiting  
820 assembly of the membrane attack complex. *Molecular Microbiology*. 2016;99(2):407-24.
- 821 72. Tkacova Z, Pulzova LB, Mochnacova E, Jimenez-Munguia I, Bhide K, Mertinkova P,  
822 et al. Identification of the proteins of *Borrelia garinii* interacting with human brain  
823 microvascular endothelial cells. *Ticks and Tick-borne Diseases*. 2020;11(4):101451.
- 824 73. Koenigs A, Hammerschmidt C, Jutras BL, Pogoryelov D, Barthel D, Skerka C, et al.  
825 BBA70 of *Borrelia burgdorferi* is a novel plasminogen-binding protein. *The Journal of*  
826 *Biological Chemistry*. 2013;288(35):25229-43.
- 827 74. Lin T, Gao L, Zhang C, Odeh E, Jacobs MB, Coutte L, et al. Analysis of an ordered,  
828 comprehensive STM mutant library in infectious *Borrelia burgdorferi*: insights into the genes  
829 required for mouse infectivity. *PLoS One*. 2012;7(10):e47532.
- 830 75. Tian W, Skolnick J. How well is enzyme function conserved as a function of pairwise  
831 sequence identity? *Journal of molecular biology*. 2003;333(4):863-82.

- 832 76. Arendt J, Reznick D. Convergence and parallelism reconsidered: what have we learned  
833 about the genetics of adaptation? *Trends Ecol Evol.* 2008;23(1):26-32.
- 834 77. Becker NS, Margos G, Blum H, Krebs S, Graf A, Lane RS, et al. Recurrent evolution of  
835 host and vector association in bacteria of the *Borrelia burgdorferi* sensu lato species complex.  
836 *BMC Genomics.* 2016;17(1):734.
- 837 78. Mechai S, Margos G, Feil EJ, Barairo N, Lindsay LR, Michel P, et al. Evidence for  
838 Host-Genotype Associations of *Borrelia burgdorferi* Sensu Stricto. *PLoS One.*  
839 2016;11(2):e0149345.
- 840 79. Ogden NH, Feil EJ, Leighton PA, Lindsay LR, Margos G, Mechai S, et al. Evolutionary  
841 aspects of emerging Lyme disease in Canada. *Applied and Environmental Microbiology.*  
842 2015;81(21):7350-9.
- 843 80. Ogden NH, Mechai S, Margos G. Changing geographic ranges of ticks and tick-borne  
844 pathogens: drivers, mechanisms and consequences for pathogen diversity. *Frontiers in Cellular  
845 and Infection Microbiology.* 2013;3:46.
- 846 81. Vollmer SA, Feil EJ, Chu CY, Raper SL, Cao WC, Kurtenbach K, et al. Spatial spread  
847 and demographic expansion of Lyme borreliosis spirochaetes in Eurasia. *Infection, genetics  
848 and evolution : Journal of Molecular Epidemiology and Evolutionary Genetics in Infectious  
849 Diseases.* 2013;14:147-55.
- 850 82. Schulze-Lefert P, Panstruga R. A molecular evolutionary concept connecting nonhost  
851 resistance, pathogen host range, and pathogen speciation. *Trends Plant Sci.* 2011;16(3):117-25.
- 852 83. Yokoyama Y, Lambeck K, De Deckker P, Johnston P, Fifield LK. Timing of the Last  
853 Glacial Maximum from observed sea-level minima. *Nature.* 2000;406(6797):713-6.

- 854 84. Clark PU, Dyke AS, Shakun JD, Carlson AE, Clark J, Wohlfarth B, et al. The Last  
855 Glacial Maximum. *Science*. 2009;325(5941):710-4.
- 856 85. Purser JE, Norris SJ. Correlation between plasmid content and infectivity in *Borrelia*  
857 *burgdorferi*. *Proceedings of the National Academy of Sciences of the United States of*  
858 *America*. 2000;97(25):13865-70.
- 859 86. Bunikis I, Kutschan-Bunikis S, Bonde M, Bergstrom S. Multiplex PCR as a tool for  
860 validating plasmid content of *Borrelia burgdorferi*. *Journal of Microbiological Methods*.  
861 2011;86(2):243-7.
- 862 87. Kern A, Zhou CW, Jia F, Xu Q, Hu LT. Live-vaccinia virus encapsulation in pH-  
863 sensitive polymer increases safety of a reservoir-targeted Lyme disease vaccine by targeting  
864 gastrointestinal release. *Vaccine*. 2016;34(38):4507-13.
- 865 88. Coleman AS, Yang X, Kumar M, Zhang X, Promnares K, Shroder D, et al. *Borrelia*  
866 *burgdorferi* complement regulator-acquiring surface protein 2 does not contribute to  
867 complement resistance or host infectivity. *PLoS One*. 2008;3(8):3010e.
- 868 89. Derdakova M, Dudioak V, Brei B, Brownstein JS, Schwartz I, Fish D. Interaction and  
869 transmission of two *Borrelia burgdorferi* sensu stricto strains in a tick-rodent maintenance  
870 system. *Applied and Environmental Microbiology*. 2004;70(11):6783-8.
- 871 90. Rynkiewicz EC, Brown J, Tufts DM, Huang CI, Kampen H, Bent SJ, et al. Closely-  
872 related *Borrelia burgdorferi* (sensu stricto) strains exhibit similar fitness in single infections  
873 and asymmetric competition in multiple infections. *Parasites & Vectors*. 2017;10(1):64.
- 874 91. Altschul SF, Gish W, Miller W, Myers EW, Lipman DJ. Basic local alignment search  
875 tool. *Journal of Molecular Biology*. 1990;215(3):403-10.

- 876 92. Notredame C, Higgins DG, Heringa J. T-Coffee: A novel method for fast and accurate  
877 multiple sequence alignment. *Journal of Molecular Biology*. 2000;302(1):205-17.
- 878 93. Abascal F, Zardoya R, Telford MJ. TranslatorX: multiple alignment of nucleotide  
879 sequences guided by amino acid translations. *Nucleic Acids Research*. 2010;38(Web Server  
880 issue):W7-13.
- 881 94. Madeira F, Park YM, Lee J, Buso N, Gur T, Madhusoodanan N, et al. The EMBL-EBI  
882 search and sequence analysis tools APIs in 2019. *Nucleic Acids Research*.  
883 2019;47(W1):W636-W41.
- 884 95. Lin YP, Greenwood A, Nicholson LK, Sharma Y, McDonough SP, Chang YF.  
885 Fibronectin binds to and induces conformational change in a disordered region of leptospiral  
886 immunoglobulin-like protein B. *The Journal of Biological Chemistry*. 2009;284(35):23547-57.
- 887 96. Benoit VM, Fischer JR, Lin YP, Parveen N, Leong JM. Allelic variation of the Lyme  
888 disease spirochete adhesin DbpA influences spirochetal binding to decorin, dermatan sulfate,  
889 and mammalian cells. *Infection and Immunity*. 2011;79(9):3501-9.
- 890 97. Suchard MA, Lemey P, Baele G, Ayres DL, Drummond AJ, Rambaut A. Bayesian  
891 phylogenetic and phylodynamic data integration using BEAST 1.10. *Virus Evol*.  
892 2018;4(1):vey016.
- 893 98. Rambaut A. FigTree GitHub repository [Available from:  
894 <http://tree.bio.ed.ac.uk/software/figtree/>].
- 895 99. Maddison WP, Maddison, D.R. Mesquite: a modular system for evolutionary analysis.  
896 Version 3.61 2019 [Available from: <http://www.mesquiteproject.org>].
- 897 100. Kishino H, Miyata, T., Hasegawa, M. Maximum likelihood inference of protein  
898 phylogeny and the origin of chloroplasts. *Journal of Molecular Evolution*. 1990;31:151-60.



- 899 101. Kishino H, Hasegawa M. Evaluation of the maximum likelihood estimate of the  
900 evolutionary tree topologies from DNA sequence data, and the branching order in hominoidea.  
901 J Mol Evol. 1989;29(2):170-9.
- 902 102. Shimodaira H, Hasegawa, M. Multiple Comparisons of Log-Likelihoods with  
903 Applications to Phylogenetic Inference. Molecular Biology and Evolution. 1999;16(8):1114.
- 904 103. Strimmer K, Rambaut A. Inferring confidence sets of possibly misspecified gene trees.  
905 Proc Biol Sci. 2002;269(1487):137-42.
- 906 104. Shimodaira H. An approximately unbiased test of phylogenetic tree selection. Syst Biol.  
907 2002;51(3):492-508.
- 908 105. Benjamini YK, A. M. Yekutieli, D. . Adaptive linear step-up procedures that control the  
909 false discovery rate. Biometrika. 2006;93:491-507.
- 910 106. Kraiczy P, Hartmann K, Hellwage J, Skerka C, Kirschfink M, Brade V, et al.  
911 Immunological characterization of the complement regulator factor H-binding CRASP and Erp  
912 proteins of *Borrelia burgdorferi*. International journal of medical microbiology : IJMM.  
913 2004;293 Suppl 37:152-7.
- 914 107. Stepanova-Tresova G, Kopecky J, Kuthejllova M. Identification of *Borrelia burgdorferi*  
915 sensu stricto, *Borrelia garinii* and *Borrelia afzelii* in *Ixodes ricinus* ticks from southern  
916 Bohemia using monoclonal antibodies. Zentralblatt fur Bakteriologie : International Journal of  
917 Medical Microbiology. 2000;289(8):797-806.
- 918 108. Kenedy MR, Vuppala SR, Siegel C, Kraiczy P, Akins DR. CspA-mediated binding of  
919 human factor H inhibits complement deposition and confers serum resistance in *Borrelia*  
920 *burgdorferi*. Infection and Immunity. 2009;77(7):2773-82.

921 109. Tilly K, Krum JG, Bestor A, Jewett MW, Grimm D, Bueschel D, et al. *Borrelia*  
922 *burgdorferi* OspC protein required exclusively in a crucial early stage of mammalian infection.  
923 *Infection and Immunity*. 2006;74(6):3554-64.  
924

925 TABLES

926 Table 1. Summarized findings of allelically variable, host-specific transmissibility and FH-binding activity of *B. burgdorferi*, *B.*

| Spirochete strains                           | Transmissibility by wild type strains <sup>a</sup> |                | PFam54-IV variants                                                      | Transmissibility by $\Delta$ <i>cspA</i> producing PFam54-IV <sup>c</sup> |                | FH-binding activity <sup>f</sup> |                |
|----------------------------------------------|----------------------------------------------------|----------------|-------------------------------------------------------------------------|---------------------------------------------------------------------------|----------------|----------------------------------|----------------|
|                                              | Mouse                                              | Quail          |                                                                         | Mouse                                                                     | Quail          | Mouse                            | Quail          |
| <i>B. burgdorferi</i><br>B31-5A4             | +                                                  | +              | BBA68                                                                   | +                                                                         | +              | +                                | +              |
|                                              |                                                    |                | BBA69                                                                   | n.d. <sup>d</sup>                                                         | n.d.           | -                                | -              |
| <i>B. afzelii</i><br>CB43,<br>PKo,<br>or MMS | + <sup>b</sup>                                     | - <sup>b</sup> | MMSA67                                                                  | n.d.                                                                      | n.d.           | -                                | -              |
|                                              |                                                    |                | MMSA68                                                                  | n.d.                                                                      | n.d.           | -                                | -              |
|                                              |                                                    |                | MMSA69                                                                  | n.d.                                                                      | n.d.           | -                                | -              |
|                                              |                                                    |                | MMSA70                                                                  | n.d.                                                                      | n.d.           | -                                | -              |
|                                              |                                                    |                | PKoA71<br>(CspA <sub>PKo</sub> )<br>or MMSA71<br>(CspA <sub>MMS</sub> ) | + <sup>e</sup>                                                            | - <sup>e</sup> | + <sup>g</sup>                   | - <sup>g</sup> |
|                                              |                                                    |                |                                                                         |                                                                           |                |                                  |                |
| <i>B. garinii</i><br>ZQ1                     | -                                                  | +              | ZQA67                                                                   | n.d.                                                                      | n.d.           | -                                | -              |
|                                              |                                                    |                | ZQA68<br>(CspA <sub>ZQ1</sub> )                                         | -                                                                         | +              | -                                | +              |
|                                              |                                                    |                | ZSA69                                                                   | n.d.                                                                      | n.d.           | -                                | -              |
|                                              |                                                    |                | ZSA70                                                                   | n.d.                                                                      | n.d.           | -                                | -              |
|                                              |                                                    |                | ZSA71                                                                   | n.d.                                                                      | n.d.           | -                                | -              |
|                                              |                                                    |                | ZSA72                                                                   | n.d.                                                                      | n.d.           | -                                | -              |

927 *afzelii*, and *B. garinii* and their derived PFam54-IV proteins in this study and the previous study (21).

928 <sup>a</sup>Significant increase or no difference in spirochete burdens in indicated mouse or quail compared to uninfected respective animals is  
929 defined as “+” and “-”, respectively. The results were shown in Figure 1A to C and G to I.

930 <sup>b</sup>Determined using *B. afzelii* CB43

931 <sup>c</sup>Significant increase or no difference in spirochete burdens in indicated mouse or quail compared to uninfected respective animals is  
932 defined as “+” and “-”, respectively. The results are shown in Figure 3A to C and (21).

933 <sup>d</sup>Note determined.

934 <sup>e</sup>Determined using the *B. burgdorferi* strain  $\Delta cspA$  harboring the plasmid producing PKoA71(CspA<sub>PKo</sub>).

935 <sup>f</sup>Determined by qualitative ELISA in Figure 6A to C and described in (21). Statistically increasing or no different levels of binding by  
936 indicated PFam54-IV compared to that by negative control DbpA proteins are defined as “+” and “-.”

937 <sup>g</sup>Determined using recombinant version of MMSA71 (CspA<sub>MMS</sub>).

938 <sup>h</sup>Determined by reducing and non-reducing SDS-PAGE shown in Figure S8.

939 <sup>i</sup>Unable to determine due to no detection of proteins on nonreducing SDS-PAGE.

940

941

942

943

944

945

946

947

948 **FIGURE LEGENDS**

949 **Figure 1. Lyme borreliae display species-level variation of tickborne transmission to**  
950 **wildtype but not complement-deficient mice and quail.** *Ixodes scapularis* nymphs infected  
951 with *B. burgdorferi* B31-5A4 (“*Bb* B31-5A4”), *B. garinii* ZQ1 (“*Bg* ZQ1”), or *B. afzelii* CB43  
952 (“*Ba* CB43”) fed on (A-C) BALB/c mice, (D- F) C3<sup>-/-</sup> BALB/c mice, (G- I) *Coturnix* quail, or  
953 (J- L) OmCI-treated *Coturnix* quail. Uninfected nymphs and mouse and quail tissues were  
954 included as control (“Uninfect.”). Fed nymphs were collected upon repletion, and blood and the  
955 tick bite sites of skin were collected at 7 days post nymph feeding (“dpf”). Spirochete burdens in  
956 (A, D, G, and J) replete nymphs, (B, E, H, and K) tick bite site of skin (“Inoc. site”), and (C, F,  
957 I, and L) blood were determined by qPCR. For the burdens in tissue and blood samples, the  
958 resulting values were normalized to 100ng total DNA. Shown are the geometric means of  
959 bacterial loads ± 95% confidence interval of bacterial burdens in tissues and blood from 5 mice  
960 or quail per group or nymphs feeding on mice (7 nymphs carrying *Bb* B31-5A4, 6 nymphs  
961 carrying *Bg* ZQ1, or 9 nymphs carrying *Ba* CB43), C3<sup>-/-</sup> mice (15 nymphs carrying *Bb* B31-5A4  
962 or *Bg* ZQ1, or 13 nymphs carrying *Ba* CB43), quail (10 nymphs carrying *Bb* B31-5A4, 13  
963 nymphs carrying *Bg* ZQ1, or 17 nymphs carrying *Ba* CB43), or OmCI-treated quail (15 nymphs  
964 carrying *Bb* B31-5A4, 11 nymphs carrying *Bg* ZQ1, or 15 nymphs carrying *Ba* CB43).  
965 Significant differences ( $P < 0.05$ , Kruskal-Wallis test with the two-stage step-up method of  
966 Benjamini, Krieger, and Yekutieli) in the spirochete burdens relative to uninfected ticks or  
967 tissues are indicated with an asterisk.

968

969 **Figure 2. Complement in tick blood meals determines human or quail blood-specific**  
970 **spirochete transmission in feeding chamber.** (A) (left panel) The schematic diagram showing

971 the artificial feeding chamber that is used to examine the tickborne spirochete transmission in  
972 this study. **(Right panel)** The picture showing the engorged *I. scapularis* nymphs (indicated by  
973 arrows) in the chamber feeding on OmCI-treated quail blood. **(B-I)** *I. scapularis* nymphs  
974 infected with *B. burgdorferi* B31-5A4 (“*Bb* B31-5A4”), *B. garinii* ZQ1 (“*Bg* ZQ1”), or *B. afzelii*  
975 CB43 (“*Ba* CB43”), were allowed to feed in artificial feeding chambers submerging into six well  
976 plates containing **(B and C)** untreated or **(D and E)** CVF-treated human blood, or **(F and G)**  
977 untreated or **(H and I)** OmCI-treated quail blood. Blood was changed every 24-h and collected  
978 along with ticks on the fifth day of feeding. Uninfected nymphs and blood were included as  
979 control (“Uninfect.”). Spirochete burdens in **(B, D, F, and H)** fed nymphs and **(C, E, G, and I)**  
980 blood were determined by qPCR. The spirochete burdens in the blood were obtained by  
981 normalizing the resulting values to 100 ng total DNA. Shown are the geometric means of  
982 bacterial loads  $\pm$  95% confidence interval of bacterial burdens from the 3 human or quail blood  
983 samples or nymphs feeding on untreated human blood (15 nymphs carrying *Bb* B31-5A4, 10  
984 nymphs carrying *Bg* ZQ1, or 13 nymphs carrying *Ba* CB43), CVF-treated human blood (11  
985 nymphs carrying *Bb* B31-5A4, *Bg* ZQ1, or *Ba* CB43), quail blood (8 nymphs carrying *Bb* B31-  
986 5A4 or *Bg* ZQ1 or 13 nymphs carrying *Ba* CB43), or OmCI-treated quail blood (15 nymphs  
987 carrying *Bb* B31-5A4 or *Bg* ZQ1 or 16 nymphs carrying *Ba* CB43). Significant differences ( $P <$   
988 0.05, Kruskal-Wallis test with the two-stage step-up method of Benjamini, Krieger, and  
989 Yekutieli) in the spirochete burdens relative to uninfected ticks or blood are indicated with an  
990 asterisk

991

992 **Figure 3. Polymorphic quail FH-binding activity of CspA confer the distinct**  
993 **transmissibility of Lyme borreliae to quail.** *Ixodes scapularis* nymphs infected with WT *B.*

994 *burgdorferi* B31-5A15 (“B31-5A15”), *B. burgdorferi* B31-5A4NP1 $\Delta$ cspA transformed with an  
995 empty shuttle vector (“Vector”), or this deletion strain producing a mutated variant of CspA from  
996 *B. burgdorferi* B31 selectively devoid of quail FH binding activity (“L246D”), WT *B.*  
997 *burgdorferi* B31 (“B31”), *B. garinii* ZQ1 (“ZQ1”), or *B. afzelii* PKo (“PKo”) were allowed to  
998 feed on (A-C) untreated or (D-F) OmCI-treated quail. Uninfected nymphs and quail tissues were  
999 included as control (“Uninfect.”). Fed nymphs were collected upon repletion, and blood and  
1000 tissues were collected at 7 days post nymph feeding (“dpf”). Spirochete burdens in (A and D)  
1001 replete nymphs, (B and E) tick bite sites of skin (“Inoc. site”), and (C and F) blood were  
1002 determined by qPCR. For the burdens in tissue samples, the resulting values were normalized to  
1003 100ng total DNA. Shown are the geometric means of bacterial loads  $\pm$  95% confidence interval  
1004 of bacterial burdens from 5 quail tissues and blood or nymphs feeding on untreated quail (13  
1005 nymphs carrying the strains B31-5A15 or pCspA-PKo, 15 nymphs carrying the strains “Vector”,  
1006 12 nymphs carrying the strain pCspA-B31, 21 nymphs carrying the strain pCspA-ZQ1, or 17  
1007 nymphs carrying the strain pCspA-L246D), or the nymphs from OmCI-treated quail (15 nymphs  
1008 carrying the strains B31-5A15, pCspA-B31, or pCspA-PKo, 8 nymphs carrying the strains  
1009 “Vector”, 9 nymphs carrying the strain pCspA-L246D, 8 nymphs carrying the strain pCspA-  
1010 ZQ1). Significant differences ( $P < 0.05$ , Kruskal-Wallis test with the two-stage step-up method  
1011 of Benjamini, Krieger, and Yekutieli) in the spirochete burdens relative to uninfected ticks or  
1012 quail tissues are indicated with an asterisk.

1013

1014 **Figure 4. Allelically variable FH-binding activity of CspA dictates human- and quail blood-**  
1015 **specific transmission in feeding chambers by evading complement in tick blood meals. *I.***  
1016 *scapularis* nymphs infected with WT *B. burgdorferi* B31-5A15 (“B31-5A15”), *B. burgdorferi*



1017 B31-5A4NP1 $\Delta$ cspA transformed with an empty shuttle vector (“Vector”), or this deletion strain  
1018 transformed to produce a mutated variant of CspA from *B. burgdorferi* B31 selectively devoid of  
1019 FH binding activity (“L246D”), WT *B. burgdorferi* B31 (“B31”), *B. garinii* ZQ1 (“ZQ1”), or *B.*  
1020 *afzelii* PKo (“PKo”) were allowed to feed in feeding chambers submerged into 6-well plates  
1021 containing **(A and B)** untreated or **(C and D)** CVF-treated human blood, or **(E and F)** untreated  
1022 or **(G and H)** OmCI-treated quail blood. Blood was changed every 24-h and was collected along  
1023 with ticks on the fifth day of feeding. Uninfected nymphs and blood were included as control  
1024 (“Uninfect.”). Spirochete burdens from **(A, C, E and G)** fed nymphs and **(B, D, F, and H)** blood  
1025 were determined by qPCR. For the burdens in tissue samples, the resulting values were  
1026 normalized to 100ng total DNA. Shown are the geometric means of bacterial loads and 95%  
1027 confidence interval of bacterial burdens from 3 human and quail blood samples, or nymphs  
1028 feeding on untreated human blood (15 nymphs carrying the strains B31-5A15 or pCspA-B31, 14  
1029 nymphs carrying the strains “Vector” or pCspA-PKo, 17 nymphs carrying the strain pCspA-  
1030 L246D, or 16 nymphs carrying the strain pCspA-ZQ1), or CVF-treated human blood (9 nymphs  
1031 carrying the strain B31-5A15, 7 nymphs carrying the strains “Vector”, pCspA-B31, or pCspA-  
1032 ZQ1, or 11 nymphs carrying the strains pCspA-L246D or pCspA-PKo), untreated quail blood  
1033 (11 nymphs carrying the strains B31-5A15 or “Vector”, 8 nymphs carrying the strains pCspA-  
1034 B31 or pCspA-PKo, or 7 nymphs carrying the strains pCspA-ZQ1 or pCspA-L246D) or OmCI-  
1035 treated quail blood (15 nymphs carrying the strains B31-5A15, pCspA-PKo, or pCspA-ZQ1, 12  
1036 nymphs carrying the strains “Vector” or pCspA-B31, or 13 nymphs carrying the strain pCspA-  
1037 L246D). Significant differences ( $P < 0.05$ , Kruskal-Wallis test with the two-stage step-up  
1038 method of Benjamini, Krieger, and Yekutieli) in the spirochete burdens relative to uninfected  
1039 ticks or quail tissues are indicated with an asterisk.

1040

1041 **Figure 5. Pairwise comparisons reveal spirochete genospecies-specific CspA**  
1042 **polymorphisms. (A)** The synteny of Pfam54-IV proteins from *B. burgdorferi* B31, *B. afzelii*  
1043 PKo, and *B. garinii* ZQ1 **(B)** CspA variants from *B. burgdorferi*, *B. afzelii*, and *B. garinii*  
1044 identified in Fig. S5-S7 were aligned by codon using T-Coffee on the TranslatorX server. **(C)**  
1045 The pairwise identity percentages were plotted versus the number of comparisons with those  
1046 respective values, with bin widths of 0.25. Clear breaks in the pairwise sequence identity  
1047 distribution were inspected to differentiate the highly identical (> 95%) from moderately  
1048 divergent comparisons (< 80%). More than 95% identity in the comparisons of the variants  
1049 between strains within spirochete genospecies but < 72% identity between genospecies indicate  
1050 genospecies-specific *cspA* variation.

1051

1052 **Figure 6. Allelically variable, host-specific FH-binding activity of CspA has emerged from**  
1053 **convergent evolution. (A to C)** 2  $\mu$ M of histidine-tagged Pfam54-IV proteins from *B.*  
1054 *burgdorferi* B31-5A4, *B. afzelii* PKo, or *B. garinii* ZQ1 or recombinant histidine-tagged DbpA  
1055 from *B. burgdorferi* B31-5A4 (negative control) were added in triplicate to wells coated with of  
1056 purified **(A)** BSA (negative control) or **(B)** mouse or **(C)** quail FH. The protein binding was  
1057 measured by ELISA in three independent experiments. Each bar represents the geometric mean  $\pm$   
1058 95% confidence interval of three replicates in one representative experiment. Significant  
1059 differences ( $P < 0.05$ , Kruskal-Wallis test with the two-stage step-up method of Benjamini,  
1060 Krieger, and Yekutieli) in the levels of FH binding of indicated proteins relative to DbpA (“\*\*”)   
1061 are indicated. The ability of each protein in binding to factor H is summarized in Table 1. **(D)** A  
1062 Bayesian phylogenetic reconstruction was generated based on the nucleotide sequences encoding

1063 Pfam54-IV proteins from *B. burgdorferi* B31 (blue), *B. afzelii* PKo (green), *B. garinii* ZQ1  
1064 (orange). In brief, these sequences were aligned by codon using T-Coffee on the TranslatorX  
1065 webserver. Phylogenetic reconstruction was generated based on the resulting nucleotide  
1066 alignment using BEAST2 with a lognormal uncorrelated relaxed clock with an estimated  
1067 mutation rate of  $4.75 \times 10^{-6}$  substitutions/site/year (“s/s/y”) with a coalescent Bayesian skyline  
1068 population. The resulting tree is drawn to scale, with branch lengths measured in the number of  
1069 substitutions per site and rooted at the midpoint for clarity. The scale bar at the bottom represents  
1070 an approximate timeline of evolution, in years before present (“YBP”), using the estimated  
1071 substitution rate of  $4.75 \times 10^{-6}$  substitutions/site/year. Node bars represent the 95% highest  
1072 posterior density of the node age. Node circles represent the posterior probability support.  
1073 Branches are colored based on estimated the median substitution rate as per the legend to the left.  
1074 **(E)** Maximum likelihood- and parsimony-based ancestral state reconstructions were used to  
1075 predict FH-binding activities at ancestral nodes. FH-binding activities were not predicted at any  
1076 node, and the likelihood of FH-binding activities at nodes immediately prior to CspA variants are  
1077 indicated.

1078

1079

1080

1081

1082

1083

1084

1085

1086

1087

1088

1089

1090

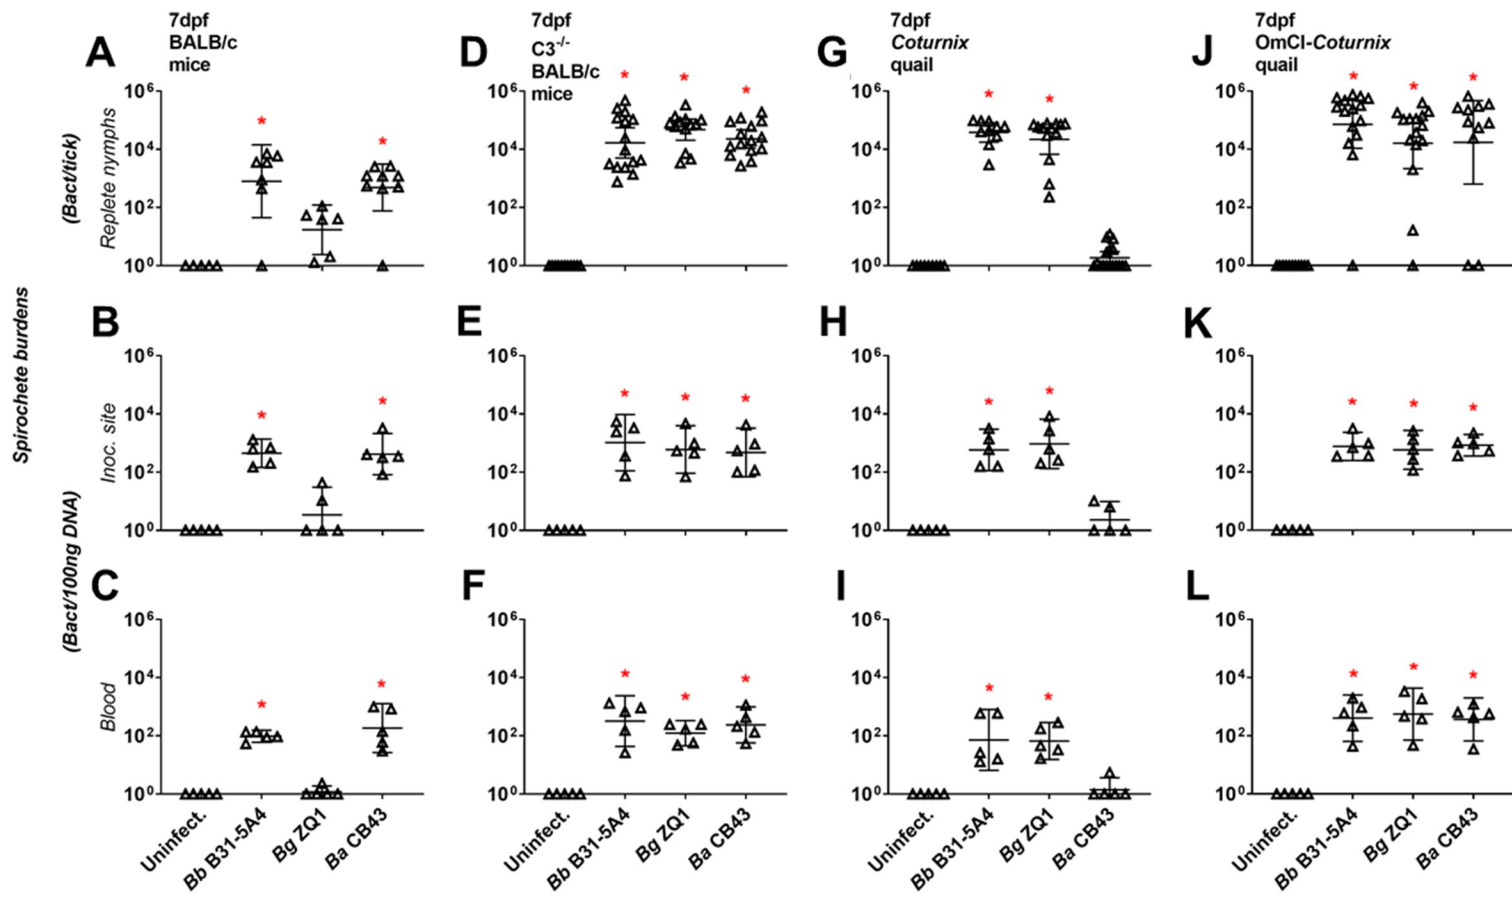

**A**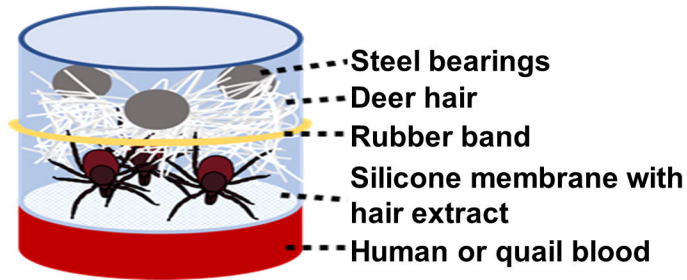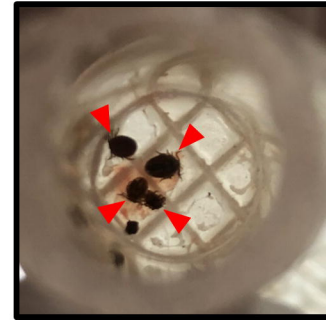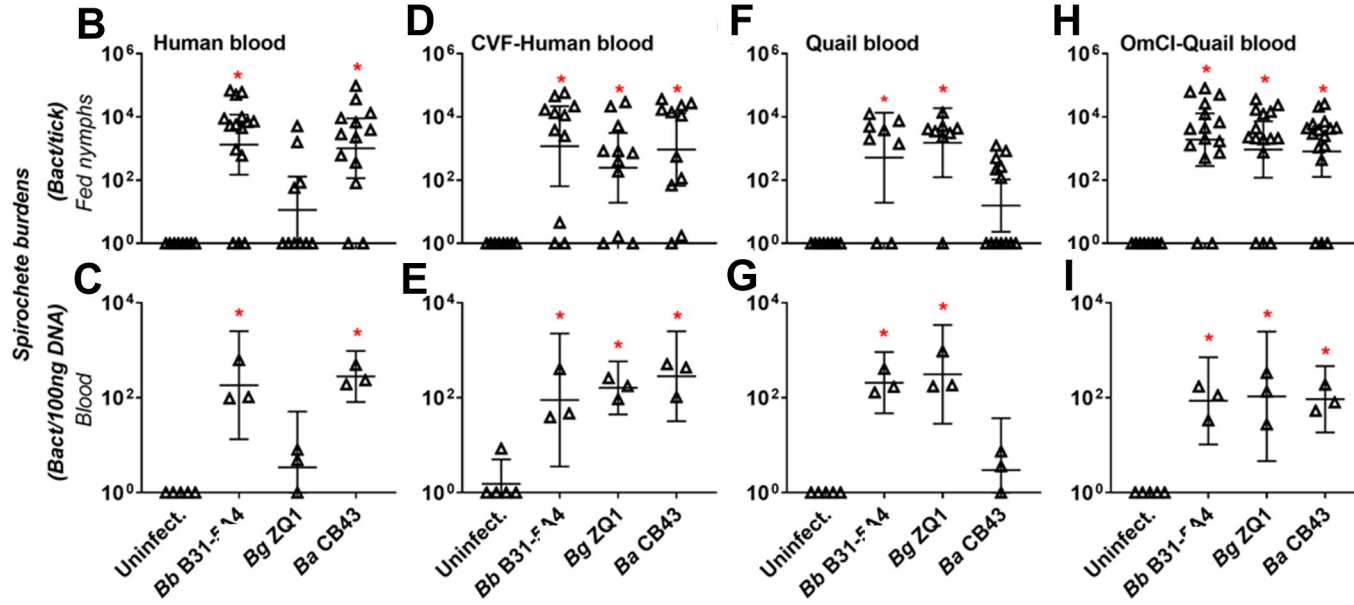

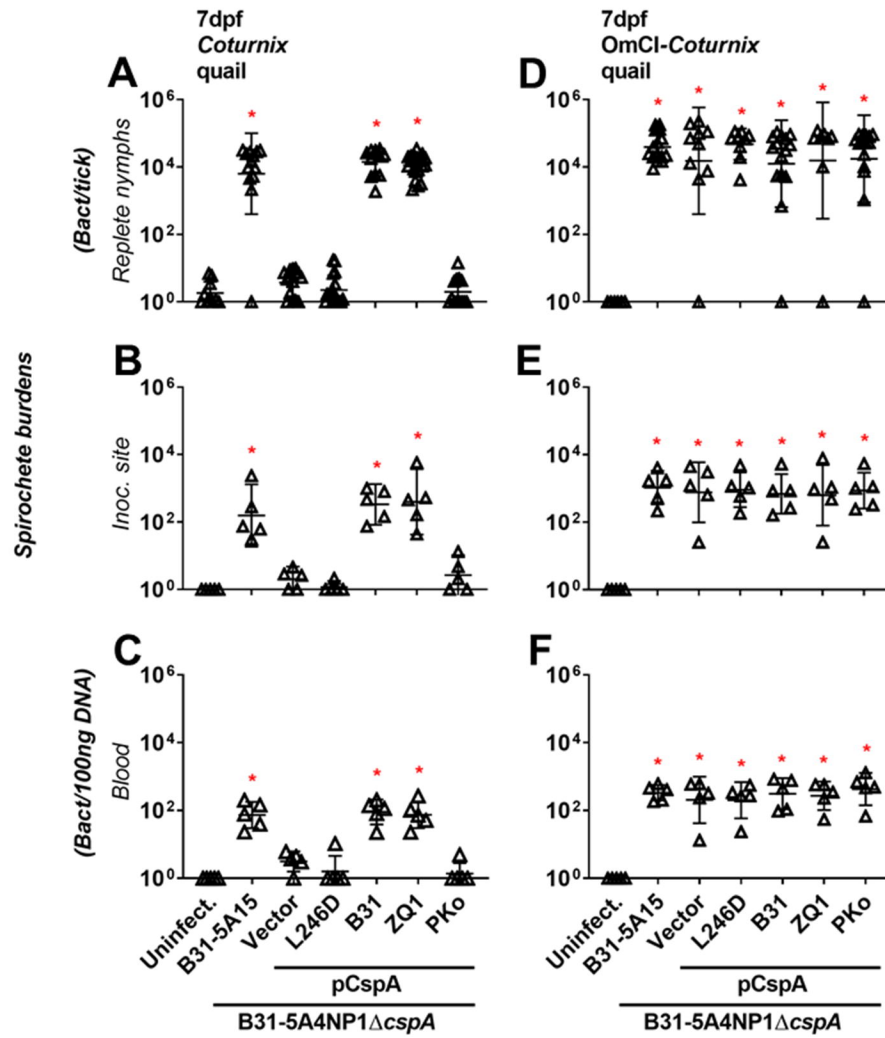

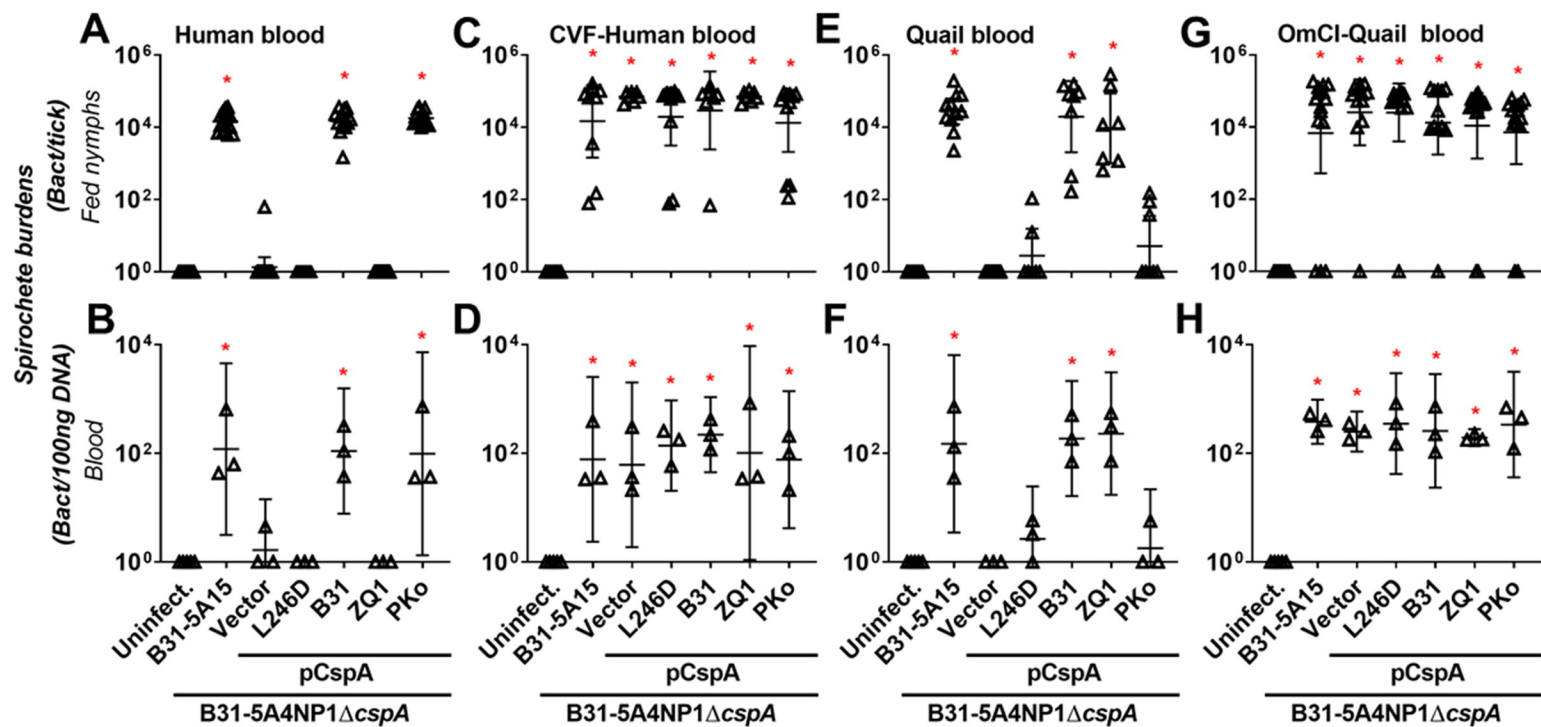



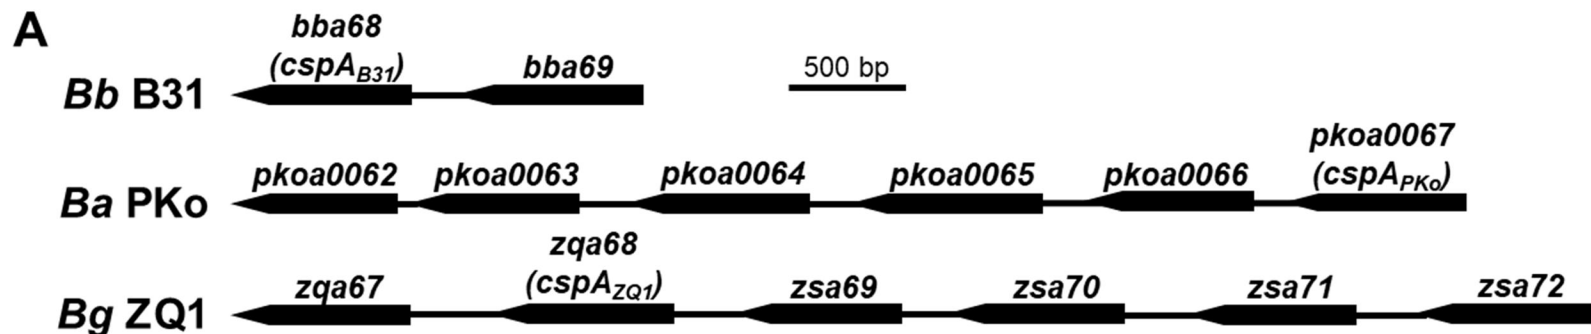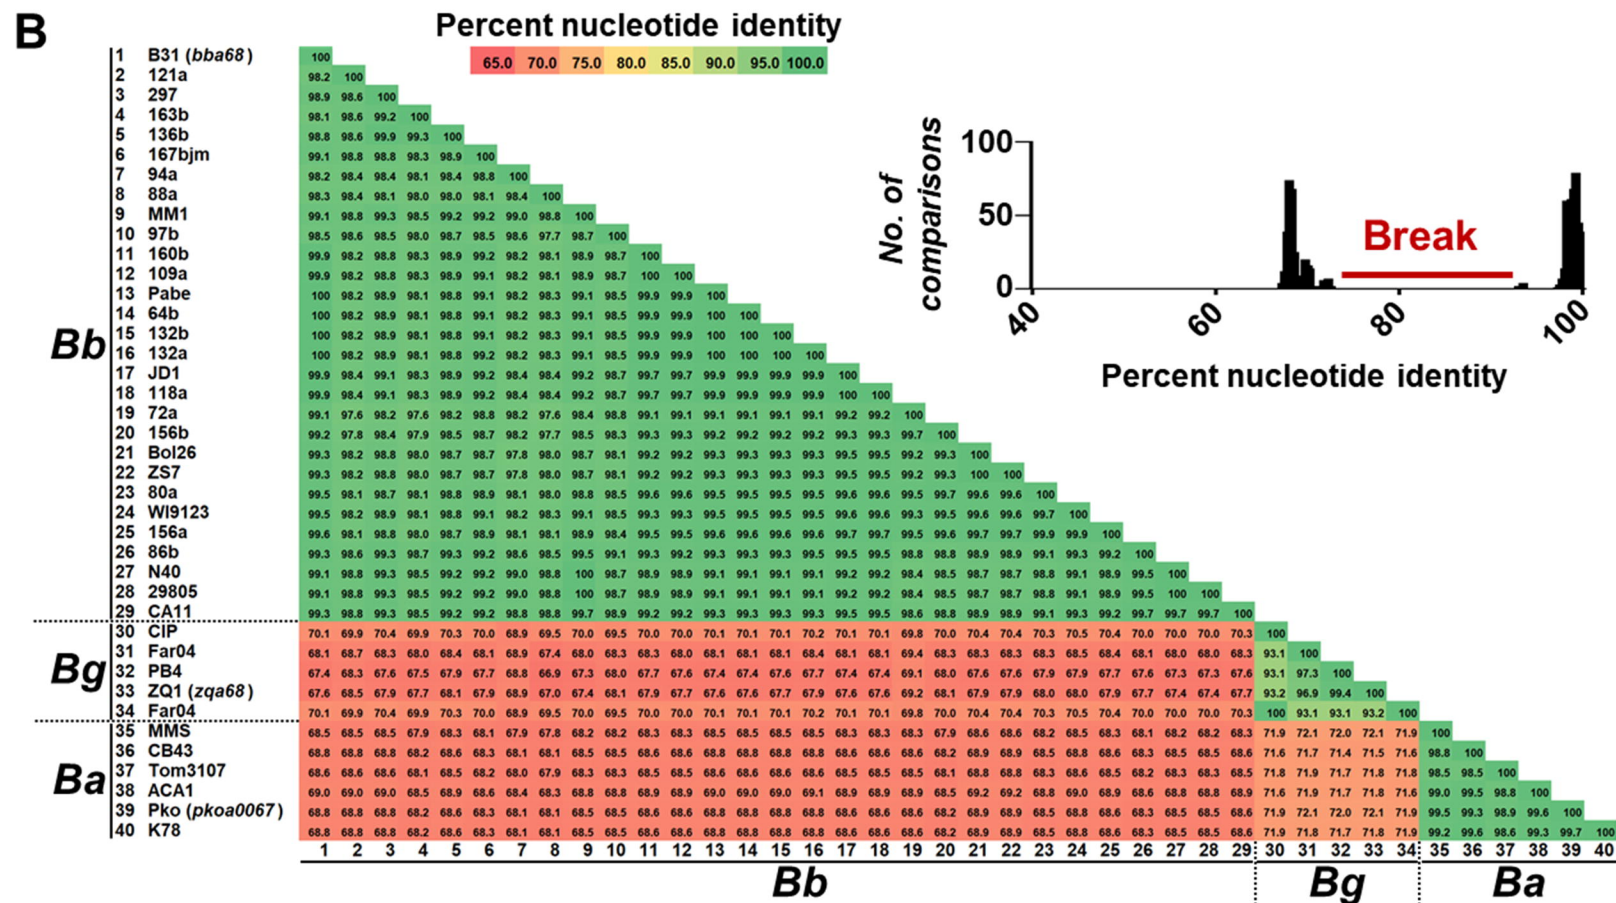

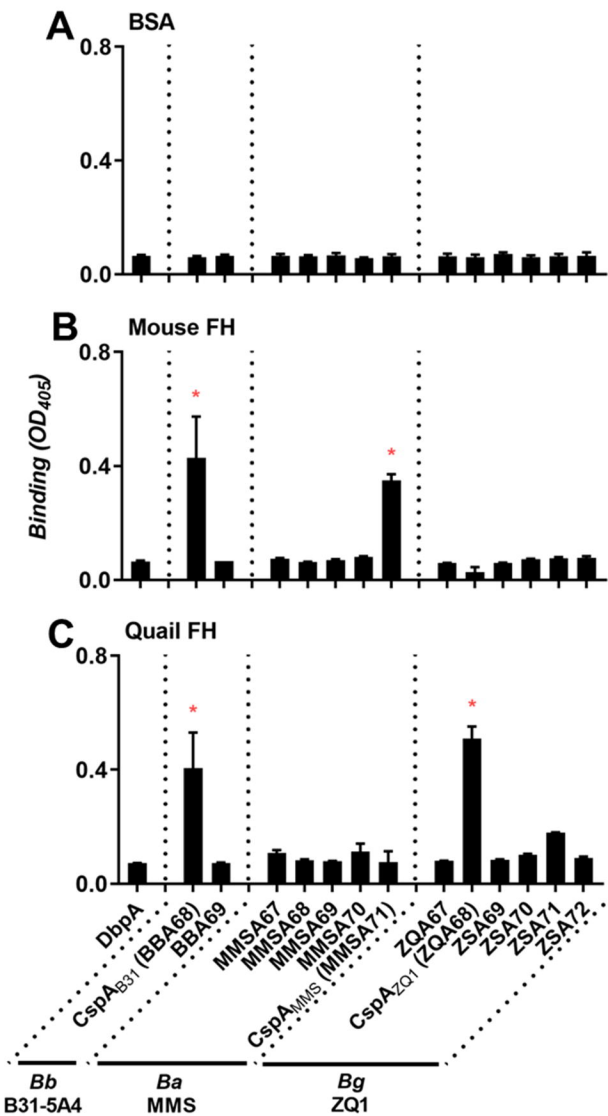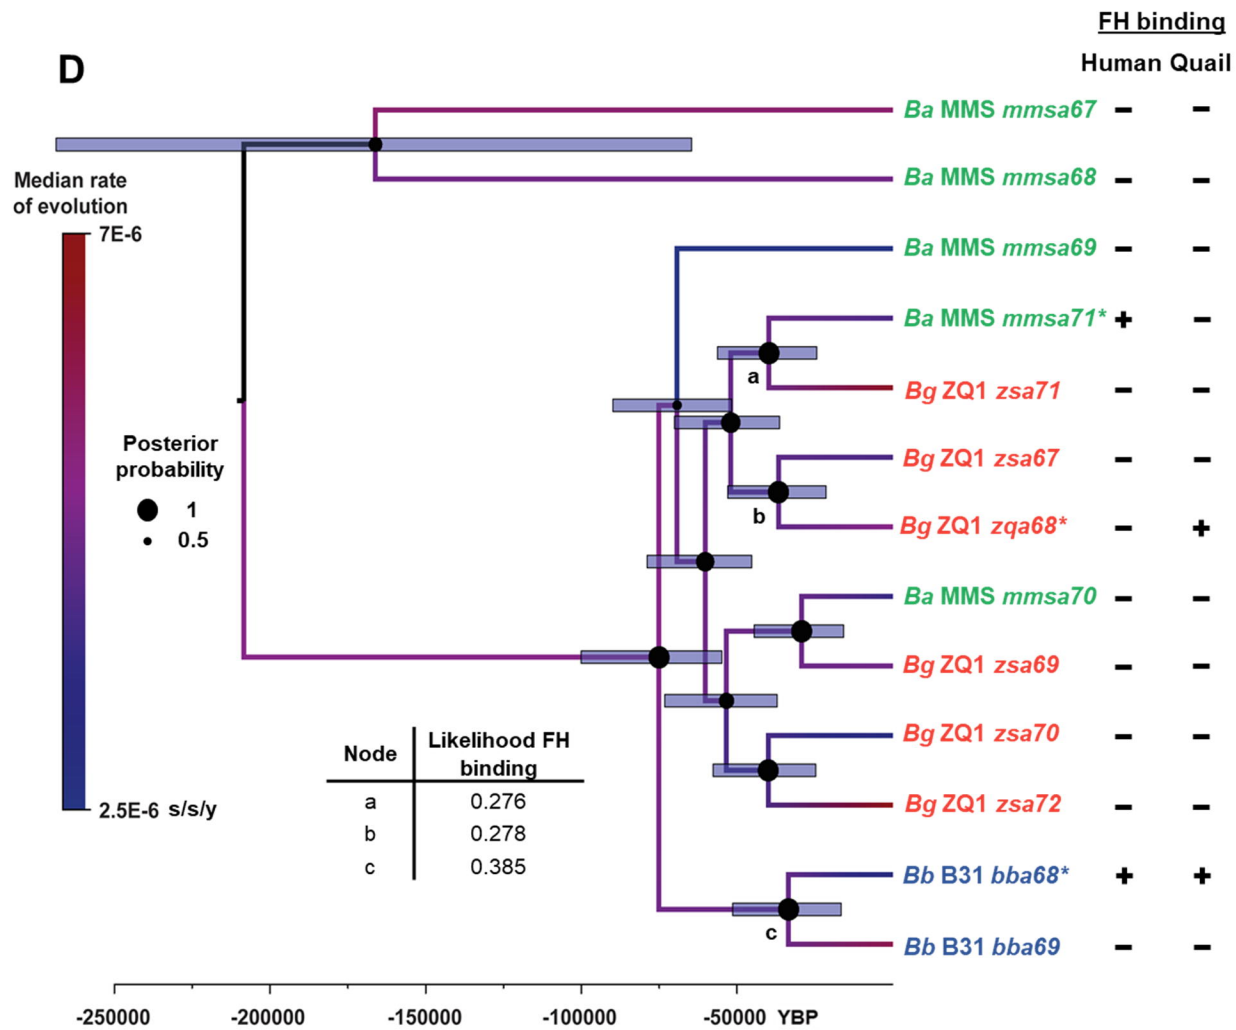

Source: https://www.biorxiv.org/content/10.1101/2021.02.09.430532v1.full.pdf
